# Supplementary material for: How do National Health Service (NHS) organisations respond to patient concerns? A qualitative interview study of the Patient Advice and Liaison Service (PALS)
Source: PubMed Central journal article supplement — BMJ Open. 2021 Nov 25;11(11):e053239. doi: 10.1136/bmjopen-2021-053239 (PMC8627391; doi:10.1136/bmjopen-2021-053239), 2021-11-25
Supplement: bmjopen-2021-053239.draft_revisions.pdf [file bmjopen-2021-053239.draft_revisions.pdf]

# BMJ Open

BMJ Open is committed to open peer review. As part of this commitment we make the peer review history of every article we publish publicly available.

When an article is published we post the peer reviewers' comments and the authors' responses online. We also post the versions of the paper that were used during peer review. These are the versions that the peer review comments apply to.

The versions of the paper that follow are the versions that were submitted during the peer review process. They are not the versions of record or the final published versions. They should not be cited or distributed as the published version of this manuscript.

BMJ Open is an open access journal and the full, final, typeset and author-corrected version of record of the manuscript is available on our site with no access controls, subscription charges or pay-per-view fees (<http://bmjopen.bmj.com>).

If you have any questions on BMJ Open's open peer review process please email [info.bmjopen@bmj.com](mailto:info.bmjopen@bmj.com)

# BMJ Open

## How do NHS Organisations respond to patient concerns? A qualitative interview study of the Patient Advice and Liaison Service (PALS)

|                               |                                                                                                                                                                                                                                  |
|-------------------------------|----------------------------------------------------------------------------------------------------------------------------------------------------------------------------------------------------------------------------------|
| Journal:                      | <i>BMJ Open</i>                                                                                                                                                                                                                  |
| Manuscript ID                 | bmjopen-2021-053239                                                                                                                                                                                                              |
| Article Type:                 | Original research                                                                                                                                                                                                                |
| Date Submitted by the Author: | 09-May-2021                                                                                                                                                                                                                      |
| Complete List of Authors:     | Shepard, Keegan; University of Oxford, Department of Experimental Psychology<br>Buivydaite, Ruta; University of Oxford, Department of Experimental Psychology<br>Vincent, Charles; University of Oxford, Experimental Psychology |
| Keywords:                     | Health & safety < HEALTH SERVICES ADMINISTRATION & MANAGEMENT, Risk management < HEALTH SERVICES ADMINISTRATION & MANAGEMENT, Health policy < HEALTH SERVICES ADMINISTRATION & MANAGEMENT                                        |
|                               |                                                                                                                                                                                                                                  |

SCHOLARONE™  
Manuscripts

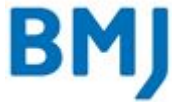

I, the Submitting Author has the right to grant and does grant on behalf of all authors of the Work (as defined in the below author licence), an exclusive licence and/or a non-exclusive licence for contributions from authors who are: i) UK Crown employees; ii) where BMJ has agreed a CC-BY licence shall apply, and/or iii) in accordance with the terms applicable for US Federal Government officers or employees acting as part of their official duties; on a worldwide, perpetual, irrevocable, royalty-free basis to BMJ Publishing Group Ltd ("BMJ") its licensees and where the relevant Journal is co-owned by BMJ to the co-owners of the Journal, to publish the Work in this journal and any other BMJ products and to exploit all rights, as set out in our [licence](#).

The Submitting Author accepts and understands that any supply made under these terms is made by BMJ to the Submitting Author unless you are acting as an employee on behalf of your employer or a postgraduate student of an affiliated institution which is paying any applicable article publishing charge ("APC") for Open Access articles. Where the Submitting Author wishes to make the Work available on an Open Access basis (and intends to pay the relevant APC), the terms of reuse of such Open Access shall be governed by a Creative Commons licence – details of these licences and which [Creative Commons](#) licence will apply to this Work are set out in our licence referred to above.

Other than as permitted in any relevant BMJ Author's Self Archiving Policies, I confirm this Work has not been accepted for publication elsewhere, is not being considered for publication elsewhere and does not duplicate material already published. I confirm all authors consent to publication of this Work and authorise the granting of this licence.

1  
2  
3 **How do NHS Organisations respond to patient concerns? A qualitative interview study of**  
4 **the Patient Advice and Liaison Service (PALS)**  
5

6  
7 Dr Keegan Shepard<sup>1</sup>, Dr Ruta Buivydaite<sup>1</sup>, Prof Charles Vincent<sup>1</sup>  
8  
9

---

16  
17  
18 **Correspondence:**

19 Dr Ruta Buivydaite

20 Department of Experimental Psychology, University of Oxford, Radcliffe House, Radcliffe  
21 Observatory Quarter, Woodstock Road, Oxford, OX2 6GGUK

22 Email: [ruta.buivydaite@psy.ox.ac.uk](mailto:ruta.buivydaite@psy.ox.ac.uk)  
23  
24

25 <sup>1</sup> Department of Experimental Psychology, University of Oxford, Radcliffe House, Radcliffe  
26 Observatory Quarter, Woodstock Road, Oxford, OX2 6GGUK  
27

28 **Key Words:** Patient Concerns, complaints management, patient satisfaction, organisational  
29 learning  
30

31  
32 **Word Count:** 4400  
33  
34  
35  
36  
37  
38  
39  
40  
41  
42  
43  
44  
45  
46  
47  
48  
49  
50  
51  
52  
53  
54  
55  
56  
57  
58  
59  
60

## ABSTRACT

### Objectives

To describe the current work of the Patient Advice and Liaison Service (PALS) and assess the service's potential to resolve concerns and contribute to organisational learning.

### Design

A qualitative study using semi-structured interviews.

### Setting

Four mental health trusts and four acute trusts in the English NHS.

### Participants

Twenty-four participants, comprising eight PALS Managers, eight PALS Officers, or their equivalents, and eight healthcare staff working with PALS teams.

### Methods

The interviews explored the role of PALS, policies and guidance, relationship between PALS and clinical staff, patient and staff awareness, data collected, as well as barriers to resolving concerns and recommendations for change. The Framework Method was used for the qualitative data analysis.

### Results

PALS teams fulfil their core responsibilities by acting as a point of contact for patients, providing information and resolving a variety of recurrent problems. The remit and responsibilities of each PALS service has often broadened considerably over time. Senior healthcare management had widely differing views on how the PALS service should operate and the management of complaints is a much higher priority. Few PALS teams carried out any analysis of the data collected or shared data within their organisations.

### Conclusions

PALS teams fulfil their core responsibilities by acting as a point of contact for patients, providing information and resolving patient concerns. Many PALS staff also act as navigators of services, mediators between families and staff and on occasion appear to act as patient advocates in supporting them to raise concerns. PALS has the potential to reduce complaints, increase patient satisfaction and provide rapid organisational feedback and learning. Achieving this potential will require more awareness and support within organisations together with updated national policy guidance.

### Strengths and limitations of this study

- To our knowledge, this is the only study of PALS in the last decade.
- We were able to talk in depth both to PALS teams and to clinicians and managers who worked with those teams to gain a rich picture of the work of PALS and the challenges they face.
- The study sites were spread widely across England and involved acute, mental health and community organisations.
- This qualitative study should however be considered only as an initial exploration of the work of PALS.
- We cannot be sure how frequently PALS teams succeed in resolving concerns or how their wider patient engagement and training of staff has been received.

## INTRODUCTION

While patients are generally very positive about the care they receive, many patients have concerns about their care, whether or not they choose to raise these formally as complaints or claims<sup>1-7</sup>. Serious adverse outcomes are more likely to lead to patients using the formal pathways to raise complaints or litigation; however, many other factors, such as whether patients receive apologies and explanations, are also critically important in determining how patients and families respond<sup>8</sup>. Patient concerns which go unaddressed, may lead to patients being reluctant to return to a healthcare organisation and being less likely to follow the guidance of medical professionals<sup>9 10</sup>.

Patients, families and friends can raise concerns about their care with the Patient Advice and Liaison Service (PALS), which is provided in every NHS Trust in England<sup>11</sup>. The service was first established in 2002 with the primary aim of supporting patients and families in raising concerns, and this focus has remained unchanged at the policy level<sup>11</sup>. PALS maintains a presence within every NHS Trust and provides services in person, by email, post and telephone. PALS teams have core duties established nationally (*Box 1*) but are free to decide how to discharge these responsibilities<sup>11</sup>. The approach of individual PALS teams depends on a variety of factors, including the population they serve, their level of funding and the approach taken by senior leadership in defining their local roles and responsibilities<sup>12-14</sup>.

### *Box 1. The principal responsibilities of PALS*

- Be noticeable and accessible within their NHS Trust
- Listen to the concerns, questions and comments raised by patients, carers, families and friends concerning their care or treatment
- Provide helpful support, as well as accurate information and advice to resolve issues and concerns as quickly as possible
- Assist NHS staff who are raising a concern on behalf of patients, which may involve liaising with other sites and healthcare organisations
- Provide information and advice to individuals wishing to raise a formal complaint

<sup>11</sup>

Although the service existed for almost two decades, there are very few studies of its activities or effectiveness. This is surprising given the longstanding concern with the level of complaints and litigation and the potential of PALS services to resolve concerns at an early stage. Evans, et al.<sup>14</sup> found that service users reported a high level of satisfaction with PALS even when their preferred outcome was not realised. They suggested that the service had the potential to reduce complaints and was extremely cost-effective for the NHS. Since this report in 2008, the PALS service has continued to operate with almost no external review or account of how the service has evolved in the two decades since its inception<sup>14</sup>.

This study aimed to describe the current work of PALS and to make a preliminary assessment of the potential of the service to resolve concerns and to facilitate learning from patient concerns. In

1  
2  
3 particular, we aimed to explore: (1) The role of the PALS team (2) the nature and response to  
4 concerns brought to PALS; (3) barriers and facilitators of concerns resolution and (4) how PALS  
5 data is used for wider learning within the host organisation.  
6  
7  
8  
9  
10  
11  
12  
13  
14  
15  
16  
17  
18  
19  
20  
21  
22  
23  
24  
25  
26  
27  
28  
29  
30  
31  
32  
33  
34  
35  
36  
37  
38  
39  
40  
41  
42  
43  
44  
45  
46  
47  
48  
49  
50  
51  
52  
53  
54  
55  
56  
57  
58  
59  
60

For peer review only



## METHODS

### Design

Qualitative study with narrative research approach using semi-structured interviews with members of PALS teams and clinicians who worked with those teams.

### Participants

We purposively selected eight NHS Trusts, four mental health and community and four acute, spread widely across England. While we did not intend to make formal comparisons between acute and mental health PALS teams, we were concerned to capture the range of PALS activities in a diverse group of Trusts. PALS teams were initially sent a description of the study and then contacted to discuss the study and invite them to participate. We asked to interview the PALS Lead or Manager, and for them to nominate a PALS Officer and clinician familiar with their work. Participants were informed that the purpose of the study was to explore how organisations can best respond to patient concerns. All participants approached agreed to participate and none dropped out of the study.

We interviewed three people within each NHS Trust, a PALS Manager, PALS Officer, or their equivalents, and a clinical member of staff suggested by the PALS manager. Clinical participants all had substantial experience of resolving patient concerns and experience of working with the PALS team. Five of the clinicians were nurses, one a midwife and two service managers.

### Development of semi-structured interview

The interview schedule development was informed by a literature review, three pilot interviews, and discussion with Patient Advisors (Appendix I). The interview addressed a range of different topics, including the role of PALS teams, policies and guidance outlining their responsibilities, relationship between PALS and clinical staff, patient and staff awareness, barriers to resolving concerns, data collection and analysis and recommendations to improve going forward. Phrasing of specific questions varied slightly across the three types of participants' but covered the same core content.

Participants were offered their preference of video conferencing software, including Microsoft Teams, Zoom and Skype, as well as an option to conduct the interview over the phone. In total, 24 semi-structured interviews were conducted between July and October 2020, lasting an average of 41 minutes each. Data saturation was reached after interviewing the participants from the 7<sup>th</sup> trust, however we continued interviewing as we aimed to have 8 trust in total (4 mental health and 4 acute).

## Data analysis

Interviews were audio-recorded, transcribed verbatim and anonymised, before being uploaded onto © 2018 QSR International's NVivo 12 Software. The interviews were stored on password protected university computers. The seven stages of the Framework Method of data analysis were adhered to throughout the processes of analysis<sup>15</sup>. Following familiarisation with the interviews, the process of coding was carried out with the first four transcripts to develop an initial analytical framework. Notes taken during and after interviews assisted in the identification of core themes. Any salient emergent categories were grouped into subdominant themes, which were subsequently grouped into broader dominant themes. The coding framework was reviewed and refined by the authors in successive iterations, before being reapplied to new transcripts, and further refined to produce the final coding framework.

The full data set was then tabulated in a matrix, which presented the data in a visually accessible and navigable format. A key feature of the Framework Method is the matrix output, which was pivotal in the identification of subdominant and dominant themes. Data analysis was carried out by one author (KS), with additional double coding of a sample of interviews (RB) to ensure consistency of coding and interpretation. The two analysts had no prior connection with PALS, had never used the PALS service and this was their first encounter with the service.

The initial results were shared with the participants, they provided the feedback, but the original themes remain. No major changes were made to the findings or further interviews undertaken.

## Participant anonymisation

The participants quotes were anonymised using the agreed coding method. Alphabetical letters were given to each participant and the number for their level of seniority: 1 is PALS Manager, 2 is PALS Officer and 3 is the Clinician. Each trust was given letter T and a number. Thus, [D1, T3] represents a PALS Manager from Trust 3.

## Patient and public involvement

Two Patient and Public Involvement (PPI) Lay Research Advisors from the Quality, Safety and Outcomes Policy Research Unit ([www.qso.ac.uk](http://www.qso.ac.uk)) reviewed the design of study, the materials used, including the interview schedules, and provided comments on the findings.

## Ethics

The study was assessed and categorised as a service evaluation by the local ethics committee. All participants provided written informed consent to take part in the interviews.

## RESULTS

Four dominant themes emerged from the analysis: the Role of PALS, Concerns and their Resolution, Barriers to Resolution, and Learning from Concerns. Common themes were found across mental health and acute Trusts, although the nature of concerns raised naturally varied in different contexts. For simplicity, we use the word 'patient' to broadly indicate the person raising the concern, while being aware that this may be a friend or family member and also that the term 'service-user' is more commonly used in mental health organisations.

### The role of PALS

PALS acts as a point of contact for patients and service-users, to answer questions and respond to whatever concerns they have. PALS staff frequently contact clinicians to seek information and, where necessary, seek help in resolving conflicts or misunderstandings that have arisen. Where necessary, they also provide information to those wishing to submit a formal complaint.

Patients have the option to '*see them in person, on the telephone, email*' [D1-T4], as well as through post and social media in most NHS Trusts. There was no consensus from participants on which group, clinicians or PALS, was better for resolving concerns, as '*it depends on the concern*' [E2-T5] and '*there are pros to both*' [H3-T8].

PALS clearly continues to provide the services set out in the original policies and guidance. However, the PALS service has evolved in different ways in each Trust and their remit and responsibilities have often broadened considerably beyond their core duties. For instance, some teams were very visible, with the PALS office in a central location in the Trust and a PALS receptionist available at the front desk. Some PALS officers, rather than waiting for concerns to come to them, would proactively engage with patients. A small number of PALS teams provided training to clinical staff on how to resolve concerns. Most frequently, PALS teams described how they were used as a '*catch-all service*' [E1-T5], functioning more as a last resort and '*handle loads more than just patient concerns*' [E2-T5].

*'we are asked to do certain things like, I don't know, take on crisis calls, or ask to get in touch with patients, to give them updates about their care and things like that that, you know, no other team is willing to do'* [E2-T5]

*'their remit is to be that jam in the sandwich, if you like. So they are the portal. So when families or anybody make contact with a trust, that they are a way in, a route in, a funnel, if you like, for any concerns or questions or requests in any form'* [B1-T2]

According to many participants, this catch-all service role resulted from a lack of clear guidance and definition of their role within each Trust and a lack of awareness of national policy on the part of senior staff in their respective Trusts.

## Resolution of concerns

### *What concerns do patients have?*

PALS staff reported that most patient concerns related to communication, staff attitudes and waiting times. Clinicians saw these same concerns frequently but emphasised that communication and clarity about discharge plans were the most frequent concerns.

*'A lot of them are about how long people have had to wait for appointments, that's one of the big concerns that comes through all the time. Another one is communication, actually, and how people hear things that doctors have said, or not hear them, that doctors have said to them or the way they've spoken to them, or you're not getting answers that they wanted to hear' [D1-T4]*

*'Nine times out of ten, it's regarding discharge. It could be anything from discharges, having to wait for such a long time for their letters or their tablets to go home' [B3-T2]*

*'a lot of it is just about communication and attitude and not getting answers when they want answers' [C3-T3]*

Clinical staff and managers were clear that they saw resolving concerns as a legitimate part of their role, but that it required skills that not everyone has necessarily developed.

*'I think it's about using your skills that you might have developed as a clinician in terms of engagement, listening and so on and so forth. And just recognising that you've got that skill set, it's just turning it into a different function, you know, for a different outcome.' [I3-T9]*

### *When does PALS become involved?*

Patients may come to PALS because they have not been able, for whatever reason, to resolve their concern or problem with clinical staff. Patients sometimes however approach PALS direct, without first discussing their concern with clinical staff or managers. They may believe that raising their concern will have a negative impact on relationships with people caring for them or on their treatment. Clinicians who are aware of PALS may also contact the service directly or signpost the patient to PALS, if concerns cannot be resolved locally.

Once contacted, PALS teams all appeared to follow a structured process, where they liaise with the patient and clinician to find a solution to the problem presented.

*'a concern is received via email or by phone, and the PALS Officer will establish what the concern is. If it's very straightforward, they'll act upon it straightaway. If it's not straightforward, they'll need to contact the patient and then discuss what outcomes they're seeking. Once they understand, or believe that they understand, fully well what the outcome is that they're asking for, they'll take action' [C1-T3]*

PALS team members found it difficult to specify a precise series of steps that they took to resolve concerns saying that it depended very much on the nature of the concern and the relationships they had established with clinical staff involved. PALS staff are often able to find information for a patient simply because they know who to contact and how to contact them. They act as 'navigators' of the healthcare system and sometimes, more forcefully, as advocates for patients

1  
2  
3 where a firmer approach is required.  
4

5 The principal strengths of PALS were that they had more experience and 'a particular skill set'  
6 [F1-T6] for resolving concerns, and that they are an impartial third party, acting as a mediator  
7 between clinicians and service-users.  
8

9 *'We're slightly removed, separate from that department. We are employed by the trust.  
10 But we're more like a third party that patients like so they don't feel like it's them versus  
11 the clinicians and NHS, you know, we're their back-up and mouthpiece.'* [A2-T1]  
12

13 PALS staff do however need time to familiarise themselves with a particular ward, for instance, to  
14 better understand what happened and who was involved.  
15

16 *'I think what becomes very tricky is if somebody external is investigating a complaint  
17 about the complex needs service and don't know how the service works'* [F3-T6]  
18

19 Despite their different roles, all participants agreed that resolving concerns informally was  
20 preferable to resolving formal complaints, as the former requires fewer resources from the NHS  
21 Trust and provides the service-user with a much faster resolution.  
22

23 *'the idea of PALS is that hopefully we can resolve things quicker so we can just walk up  
24 to a ward and see someone or we can go and chat to the ward sister or send a quick  
25 email or do a quick phone call. Whereas the complaints process is, you know, three  
26 days to acknowledge, 25 working days to respond'* [A2-T1]  
27  
28

### 29 **Barriers to resolution of concerns**

30 Participants described several barriers that restrict the ability of both PALS and clinicians to  
31 resolve informal concerns within their Trusts.  
32  
33

#### 34 *Lack of Awareness*

35 The most significant barrier was the perception in all eight Trusts of a widespread lack of  
36 awareness of PALS and the services that they provide.  
37  
38

39 *'In my experience, clinical teams have a really bad understanding of what PALS is and  
40 what PALS does'* [E2-T5]  
41  
42

43 *'they're only aware of them, really, if they've used them before or we inform them.  
44 There are posters up, you know, if you go to any ward at the moment, there's posters  
45 up about everything. And if you're sick in bed, you're not going to be reading those  
46 posters in reality. So, yes, it's up to us to inform them.'* [A3-T1]  
47

#### 48 *Lack of Policies and Guidance Informing their Application*

49 Most PALS services did not have clear policies or guidance within their Trusts defining the scope  
50 of their role and responsibilities of the team. Some staff questioned their individual role and wished  
51 for some written guidelines.  
52  
53

54 *'I'm not really sure what my role is properly at the moment'* [I1-T9]  
55  
56  
57  
58  
59  
60

1  
2  
3 *'there needs to be some guidance for trusts to actually deliver what PALS really should be*  
4 *about'* [A1-T1]  
5

6 Some participants noted that the lack of policies and guidance increased the variability of PALS  
7 teams across England and led to the misuse of PALS within some Trusts.  
8

9 *'it makes me quite sad when I hear about other trusts, when they are using PALS in a way*  
10 *that I just don't feel is appropriate. I don't feel it's the right way...and I'm certainly not saying*  
11 *we're perfect. Far from it.'* [A1-T1]  
12

### 13 *Emphasis on complaints*

14  
15 Senior staff in all organisations paid much more attention to complaints than concerns, because  
16 complaints handling is a *'regulated service'* [A1-T1] that is monitored by regulators. This led to a  
17 lack of understanding and appreciation of the role and value of PALS.  
18

19 *'PALS does get overlooked and that happens within our trust'* [E2-T5]  
20

21 *'It felt very much like that PALS was a lower step down from complaints'* [D2-T4]  
22  
23

24 Participants believed that this emphasis on complaints sometimes led to clinicians directing  
25 patients to submit a formal complaint, when PALS could have resolved the concern instead  
26 informally.  
27

28 *'We have some consultants who feel that PALS is an unnecessary link in the chain*  
29 *and think "I'll address it and if I can't address it, then complaints will address it".'* [D2-  
30 T4]  
31

### 32 *Attitude and unavailability of Clinical Staff*

33  
34 Some clinicians distrust PALS and view working with the service as an unnecessary and time-  
35 consuming activity.  
36

37 *'you do find that staff think of you as kind of a negative and you don't get a good vibe*  
38 *all the time. They don't see us as a help, they see us as kind of a hindrance.'* [B2-T2]  
39  
40

41 Many clinicians however, view PALS in a positive light but simply do not have time to liaise  
42 effectively. PALS staff often cannot find specific clinicians due to a lack of updated contact details.  
43

44 *'It's getting hold of the person who can solve the problem for us. You know, we can email*  
45 *a consultant, but he may not be able to get to his emails for a little while'* [D1-T4]  
46

47 *'our services change every day, you know, people are moving in posts, you know,*  
48 *different managers, different services. Managers will move between services. Services*  
49 *will open and close. And no one will tell us. We have no way of knowing at all what*  
50 *services are open, what services are not, who's managing which service.'* [E2-T5]  
51  
52  
53  
54  
55  
56  
57  
58  
59  
60

## Learning from concerns

While the principal remit of PALS is the resolution of individual concerns, there is clearly potential for reflecting on those concerns and wider learning and improvement. Incident reports and complaints are routinely reviewed to provide feedback and stimulate learning and improvement, and the same could be done for PALS data.

### *What data is collected?*

PALS team varied widely in the collection of data. Some teams had established a robust approach, assigning specific categories to informal concerns, recording who was involved, relevant dates and the outcome. Other teams simply record a general description of the concern.

*'we have a whole host of codes that we use, including, for example, communication, lost property. So it's not what we think. So we don't think, 'well I don't think it was a staff member was rude', it is what the patient thinks.'* [C2-T3]

*'there aren't really any categories, so it's a complaint or a PALS inquiry or it's a local resolution. And then the detail of that complaint is just our account of it. So there's not a pull-down bar that says "it's this category, or that category, whatever".'* [I1-T9]

### *What is done with the data?*

Few PALS teams or their organisations carried out any analysis of the data collected or reflected on the many patient concerns collected.

*'we're not analysing...all we're doing at the moment is counting the numbers. And the most detailed analysis that we do, which is all off of an Excel spreadsheet, is the number of days to completion'* [I1-T9]

A recurring theme from the interviews was that there was no interest from senior Trust staff in the patient concerns data. All the emphasis is on formal complaints data.

*'The data that we produce has always been an addendum, really an appendix to the complaints material'* [E1-T5]

*'at those meetings they talk about complaints, but they don't really ask what's going on, what the trends are'* [I1-T9]

Participants acknowledged that there was no learning from informal concerns within their NHS Trust, and that the data was not shared beyond their organisation.

*'this may be shocking to you, as I wish I could say "Oh, yeah, PALS has done this and PALS has done that and we've affected loads of changes". As far as I'm concerned. No, we haven't'* [E1-T5]

*'PALS data doesn't really get shared beyond the organisation, because there isn't that requirement'* [C1-T3]

1  
2  
3 Participants understood the potential for PALS data to be used as an 'early warning system' [E1-  
4 T5]. Patients tend to raise informal concerns immediately, whereas complaints may be raised  
5 months after an incident.  
6

7 *'one of the things about PALS is that obviously it's pretty much real time feedback,*  
8 *whereas complaints is often delayed. People sometimes don't raise the complaint until*  
9 *a year after it's happened or six months or three months or whatever.'* [C1-T3]  
10  
11  
12  
13  
14  
15  
16  
17  
18  
19  
20  
21  
22  
23  
24  
25  
26  
27  
28  
29  
30  
31  
32  
33  
34  
35  
36  
37  
38  
39  
40  
41  
42  
43  
44  
45  
46  
47  
48  
49  
50  
51  
52  
53  
54  
55  
56  
57  
58  
59  
60

For peer review only



## DISCUSSION

PALS was established to provide support, information and advice to patients and families and to resolve their concerns in a timely manner. PALS teams interviewed in this study are certainly fulfilling these core responsibilities. The PALS service has however evolved in different ways in each Trust and their remit and responsibilities have often broadened considerably beyond their core duties. Many of the teams have become a kind of 'catch all' service taking on any patient liaison work not allocated elsewhere. Most participants reported that senior managers within their Trusts seemed largely unaware of the core national responsibilities of PALS and, even within Trusts, had widely differing views on how the PALS service should operate. A recurring theme was that complaints were given much higher priority and that little interest was shown in the work of PALS. All staff agreed that interventions by PALS had the advantage of being much quicker, less burdensome to both patients and staff and more personal in nature than the formal complaints process.

PALS staff appear to adopt multiple different roles according to the needs of patient and families. They act as navigators of services, mediators between families and staff and on occasion appear to act as patient advocates in supporting them to raise concerns. The role of navigator is particularly critical as patients often experience services as complex and not well integrated<sup>16 17</sup>. PALS staff are therefore providing important support to patients and families and, when successful, are potentially helping the efficient running of their organisations, restoring trust and reducing the likelihood of complaints and other problems. These findings echo those of earlier studies and show that PALS teams continue to succeed in fulfilling their national policy mandate<sup>14 18</sup>. We cannot of course, from this study, assess how often PALS staff adopt each of these roles or how often their intervention produces a successful outcome. However, they clearly do provide support to patients and families in a variety of ways, which appear not fully appreciated by their host organisations.

Most participants believed that PALS could achieve much more if the services were given more support and resource by senior management. Even within existing resources however, there is scope to develop the PALS service by sharing examples of innovation across PALS teams. PALS services could, for instance, be advertised much more widely in NHS organisations, in particular informing clinicians that PALS can support them as well as their patients<sup>19</sup>. Some PALS staff are much more active than others; visiting wards to talk to patients, engage with staff and pre-empt potential problems. Visiting wards is easier in acute Trusts which tend to be located on a small number of main sites, whereas mental health and community Trusts may be spread across multiple locations. We do not know how effective or cost-effective this is, and PALS services do not appear to record this activity, but this enhanced role should certainly be explored. Some PALS teams were more proactive still in providing training to clinical staff on how to communicate effectively and resolve patient concerns at source.

There is currently no requirement on PALS teams to collect data or any guidance for them on how this might be done. Yet concerns data represent a rich source of information, potentially

1  
2  
3 timelier and more sensitive to patient experience than data from complaints<sup>1</sup>. It would be  
4 relatively straightforward to produce a national framework for the recording and classification of  
5 patient concerns, which should have a strong emphasis on recording actions taken and  
6 outcomes<sup>20 21</sup>. The existing framework for complaints, could be modified for less serious  
7 problems<sup>22</sup>. This would allow organisations to learn from concerns and, equally important, allow  
8 wards and hospital services to monitor patient concerns near real time<sup>1 14</sup>. This is particularly  
9 useful for detecting clusters of problems or a sudden escalation of problems in a particular area,  
10 which would be revealed much more quickly in PALS data than in complaints systems.  
11  
12

### 13 14 **Strengths and limitations**

15  
16 This study is one of the very few to examine the role of PALS and the potential of services of  
17 this kind to resolve patient concerns and contribute to learning. To our knowledge, this is the  
18 only study of PALS in the last decade. We were able to talk in depth both to PALS teams and to  
19 clinicians and managers who worked with those teams to gain a rich picture of the work of PALS  
20 and the challenges they face. The study sites were spread widely across England and involved  
21 acute, mental health and community organisations. This qualitative study should however be  
22 considered only as an initial exploration of the work of PALS. In particular we cannot be sure  
23 how frequently PALS teams succeed in resolving concerns or how their wider patient  
24 engagement and training of staff has been received.  
25  
26  
27

### 28 29 **CONCLUSIONS**

30  
31 PALS teams fulfil their core responsibilities by acting as a point of contact for patients, providing  
32 information and resolving a variety of recurrent problems. The remit and responsibilities of each  
33 PALS service has often broadened considerably over time. Senior healthcare management had  
34 widely differing views on how the PALS service should operate and viewed complaints as  
35 having a much higher priority. Few PALS teams carried out any analysis of collected data or  
36 shared data within their organisations. The role of PALS teams, with their focus on early  
37 resolution of concerns and potential problems, could be enhanced which could potentially  
38 increase patient satisfaction and reduce the need for patients to make formal complaints.  
39  
40  
41  
42  
43  
44  
45  
46  
47  
48  
49  
50  
51  
52  
53  
54  
55  
56  
57  
58  
59  
60

## Acknowledgements

The authors would like to thank the eight participating NHS Trusts in England, as well as the kind PALS staff and clinicians who all gave their time during a pandemic to contribute to this service evaluation. In addition, the authors would like to thank the two Patient and Public Involvement (PPI) Lay Research Advisors, provided by the Quality, Safety and Outcomes Policy Research Unit (QSO-PRU), who all enriched the quality of the service evaluation by contribution their unique and important perspectives. We thank Jules Forder, Ray Fitzpatrick and Helen Hogan for comments on an earlier draft of this manuscript.

## Author Affiliations

KCS, CV and RB are affiliated with the University of Oxford.

## Contributors

KCS and CV conceived the service evaluation and all authors contributed to its design. KCS carried out all of the data collection and analysis, while CV extensively supervised and provided support during the process. KCS drafted the manuscript, and all of the authors reviewed and agreed on the current version.

## The research team

RS and KS has used qualitative methodology throughout their doctoral researcher. They both had extensive qualitative methods training during their studies in their respective Universities. CV has supervised many qualitative studies but received no formal training in qualitative methods.

## Funding

This study was funded by the National Institute for Health Research (NIHR) Policy Research Programme, conducted through the Quality, Safety and Outcomes Policy Research Unit, PR-PRU-1217-20702. The views expressed are those of the author(s) and not necessarily those of the NIHR or the Department of Health and Social Care.

## Competing Interests

None declared.

## Patient Consent

This research was classified as service evaluation therefore we followed the typical protocols of such research and patient consent was not required.

## Ethics Approval

This project has been reviewed by the Joint Research Office study classification group. It was determined that the activity described is best understood as a service evaluation. As such, it is not subject to the Department of Health's UK Policy Framework for Health and Social Care Research (2017). It requires neither sponsorship nor research ethics review.

**Data sharing statement**

The transcripts and original interviews will not be shared as permission from participants was not granted.

For peer review only

## References

1. Anderson WG, Winters K, Auerbach AD. Patient concerns at hospital admission. *Arch Intern Med* 2011;171(15):1399-400. doi: 10.1001/archinternmed.2011.337 [published Online First: 2011/08/10]
2. Commission CQ. Survey Finds Most Patients Are Positive About Their Hospital Care, But Many Still Experience Delays When They Leave. In: Commission CQ, ed. Online, 2017.
3. Heyn L, Ruland CM, Finset A. Effects of an interactive tailored patient assessment tool on eliciting and responding to cancer patients' cues and concerns in clinical consultations with physicians and nurses. *Patient Educ Couns* 2012;86(2):158-65. doi: 10.1016/j.pec.2011.04.024 [published Online First: 2011/05/20]
4. Mjaaland TA, Finset A, Jensen BF, et al. Patients' negative emotional cues and concerns in hospital consultations: a video-based observational study. *Patient Educ Couns* 2011;85(3):356-62. doi: 10.1016/j.pec.2010.12.031 [published Online First: 2011/03/12]
5. Mulcahy L, Tritter JQ. Pathways, Pyramids and Icebergs? Mapping the Links Between Dissatisfaction and Complaints. *Sociology of Health & Illness* 1998;20(6):825-47. doi: <https://doi.org/10.1111/1467-9566.00131>
6. O'Hara JK, Reynolds C, Moore S, et al. What can patients tell us about the quality and safety of hospital care? Findings from a UK multicentre survey study. *BMJ Quality & Safety* 2018;27(9):673-82. doi: 10.1136/bmjqs-2017-006974
7. Williams B. Patient satisfaction: A valid concept? *Social Science & Medicine* 1994;38(4):509-16. doi: [https://doi.org/10.1016/0277-9536\(94\)90247-X](https://doi.org/10.1016/0277-9536(94)90247-X)
8. Vincent C, Young M, Phillips A. Why do people sue doctors? A study of patients and relatives taking legal action. *Lancet* 1994;343(8913):1609-13. doi: 10.1016/s0140-6736(94)93062-7 [published Online First: 1994/06/25]
9. Burroughs TE, Waterman AD, Gallagher TH, et al. Patients' concerns about medical errors during hospitalization. *Jt Comm J Qual Patient Saf* 2007;33(1):5-14. doi: 10.1016/s1553-7250(07)33002-x [published Online First: 2007/02/08]
10. Burroughs TE, Waterman AD, Gallagher TH, et al. Patient concerns about medical errors in emergency departments. *Acad Emerg Med* 2005;12(1):57-64. doi: 10.1197/j.aem.2004.08.052 [published Online First: 2005/01/07]
11. Heaton J, Sloper P, Clarke S. Access to and use of NHS Patient Advice and Liaison Service (PALS): the views of children, young people, parents and PALS staff. *Child: Care, Health and Development* 2008;34(2):145-51. doi: <https://doi.org/10.1111/j.1365-2214.2007.00749.x>
12. Abbott S, Rnt J, Rhv J, et al. Patient Advice and Liaison Services: strengthening the voices of individual service users in health-care organizations. *Health Expectations* 2006;9:138-47. doi: 10.1111/j.1369-7625.2006.00384.x
13. Heaton J, Sloper P. National survey of Patient Advice and Liaison Services (PALS) in England: children, young people and parents' access to and use of PALS. *Child: Care, Health and Development* 2004;30(5):495-501. doi: <https://doi.org/10.1111/j.1365-2214.2004.00444.x>
14. Evans D, Booker S, Day N, et al. National Evaluation of Patient Advice and Liaison Services (PALS). Final Report. online: University of the West of England, 2008:1-324.
15. Gale NK, Heath G, Cameron E, et al. Using the framework method for the analysis of qualitative data in multi-disciplinary health research. *BMC Medical Research Methodology* 2013;13(1):117. doi: 10.1186/1471-2288-13-117
16. Wennberg JE. Time to tackle unwarranted variations in practice. *BMJ* 2011;342:d1513. doi: 10.1136/bmj.d1513

17. Neuhauser D, Provost L, Bergman B. The meaning of variation to healthcare managers, clinical and health-services researchers, and individual patients. *BMJ Qual Saf* 2011;20 Suppl 1(Suppl\_1):i36-40. doi: 10.1136/bmjqs.2010.046334 [published Online First: 2011/04/06]
18. Wessel M, Lynøe N, Juth N, et al. The tip of an iceberg? A cross-sectional study of the general public's experiences of reporting healthcare complaints in Stockholm, Sweden. *BMJ Open* 2012;2(1):e000489. doi: 10.1136/bmjopen-2011-000489
19. Montgomery CM, Chisholm A, Parkin S, et al. Wild data: how front-line hospital staff make sense of patients' experiences. *Sociology of Health & Illness* 2020;42(6):1424-40. doi: <https://doi.org/10.1111/1467-9566.13115>
20. Coulter A, Locock L, Ziebland S, et al. Collecting data on patient experience is not enough: they must be used to improve care. *Bmj* 2014;348:g2225. doi: 10.1136/bmj.g2225 [published Online First: 2014/03/29]
21. Martin GP, McKee L, Dixon-Woods M. Beyond metrics? Utilizing 'soft intelligence' for healthcare quality and safety. *Soc Sci Med* 2015;142:19-26. doi: 10.1016/j.socscimed.2015.07.027 [published Online First: 2015/08/19]
22. Reader TW, Gillespie A, Roberts J. Patient complaints in healthcare systems: a systematic review and coding taxonomy. *BMJ Quality & Safety* 2014;23(8):678-89. doi: 10.1136/bmjqs-2013-002437

## Appendix I

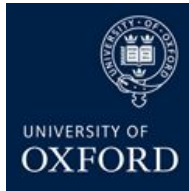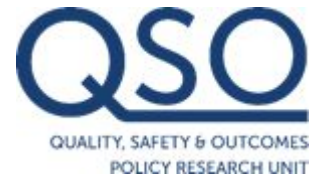

*An exploration of how organisations best respond to patient concerns.*

## Interview Schedule - PALS Officer

### Introduction

*Introduction of self and study (including differentiation between complaints and concerns), and reassurance of measures taken to protect anonymity. Thank them for taking the time to talk about their perceptions of how organisations best respond to patient concerns.*

### Breakdown of Role and PALS

*Immediate or core functions, duties and responsibilities of role and PALS team more generally*

*Perceptions of unique and extra duties and responsibilities of PALS team (surgeries, for example)*

- *Who instigated these changes?*

*Take me through the journey of a patient concern coming in from start to finish*

*How do you think PALS contributes to improving the service more generally?*

- *How could it be changed to help improve the service even more?*

### Policies and Guidance

*Do you have policy documents informing what you do?*

- *Was the development of these informed by other PALS teams or national guidelines?*
- *What is the timeframe to respond to concerns?*

### Relationship with Complaints Team

*What is the relationship between PALS and Complaints within your NHS Trust?*

*What are the strengths and limitations of this dynamic?*

### Patient Awareness

*How do PALS make patients aware of their presence and role?*

### Pathways Available to Patients

*What pathways do patients use to report their concerns?*

- *How does PALS monitor each?*

*How does the pathway used by patients impact the resolution of their concern?*

### Data

Dated: 21/1/2020 – Version 1

1  
2  
3 *What system do you use?*

- 4 - *i.e. Ulysses, Datix, etc.*  
5

6 *Do you do anything with the data?*

- 7 - *If not, how could you implement the learning from concerns?*  
8

### 9 **Training**

10 *Do you train or work with staff to help them respond to concerns on the ground?*

- 11 - *If so, could you tell me a bit about your approach?*  
12

### 13 **Issues**

14 *What issues, or barriers, are present that you think are restricting your ability to respond to patient*  
15 *concerns?*

### 16 **Recommendations**

17 *What recommendations could be made to improve how PALS, or the overall organisation, respond*  
18 *successfully to patient concerns?*

19  
20 *Do you have any suggestions about other ways PALS data and patient experiences and concerns*  
21 *could be used to improve services?*  
22

23 *What would you suggest that researchers focus on to better understand how organisations could*  
24 *become better at responding to patient concerns?*  
25  
26

---

27  
28 ***These topics are a guide to stimulate naturalistic conversation that will be probed further depending on the***  
29 ***responses of each individual participant.***  
30

### 31 **Some examples of prompt questions:**

32  
33 Can you tell me a little more about that?

34  
35 How do you explain that?

36  
37 In what way?

38  
39 Can you explain that?

40  
41 How is that?  
42  
43  
44  
45  
46  
47  
48  
49  
50  
51  
52  
53  
54  
55  
56  
57

58 Dated: 21/1/2020 – Version 1



# BMJ Open

## How do National Health Services (NHS) Organisations respond to patient concerns? A qualitative interview study of the Patient Advice and Liaison Service (PALS)

|                                 |                                                                                                                                                                                                                                  |
|---------------------------------|----------------------------------------------------------------------------------------------------------------------------------------------------------------------------------------------------------------------------------|
| Journal:                        | <i>BMJ Open</i>                                                                                                                                                                                                                  |
| Manuscript ID                   | bmjopen-2021-053239.R1                                                                                                                                                                                                           |
| Article Type:                   | Original research                                                                                                                                                                                                                |
| Date Submitted by the Author:   | 30-Aug-2021                                                                                                                                                                                                                      |
| Complete List of Authors:       | Shepard, Keegan; University of Oxford, Department of Experimental Psychology<br>Buivydaite, Ruta; University of Oxford, Department of Experimental Psychology<br>Vincent, Charles; University of Oxford, Experimental Psychology |
| <b>Primary Subject Heading</b>: | Health policy                                                                                                                                                                                                                    |
| Secondary Subject Heading:      | Mental health                                                                                                                                                                                                                    |
| Keywords:                       | Health & safety < HEALTH SERVICES ADMINISTRATION & MANAGEMENT, Risk management < HEALTH SERVICES ADMINISTRATION & MANAGEMENT, Health policy < HEALTH SERVICES ADMINISTRATION & MANAGEMENT                                        |
|                                 |                                                                                                                                                                                                                                  |

SCHOLARONE™  
Manuscripts



I, the Submitting Author has the right to grant and does grant on behalf of all authors of the Work (as defined in the below author licence), an exclusive licence and/or a non-exclusive licence for contributions from authors who are: i) UK Crown employees; ii) where BMJ has agreed a CC-BY licence shall apply, and/or iii) in accordance with the terms applicable for US Federal Government officers or employees acting as part of their official duties; on a worldwide, perpetual, irrevocable, royalty-free basis to BMJ Publishing Group Ltd ("BMJ") its licensees and where the relevant Journal is co-owned by BMJ to the co-owners of the Journal, to publish the Work in this journal and any other BMJ products and to exploit all rights, as set out in our [licence](#).

The Submitting Author accepts and understands that any supply made under these terms is made by BMJ to the Submitting Author unless you are acting as an employee on behalf of your employer or a postgraduate student of an affiliated institution which is paying any applicable article publishing charge ("APC") for Open Access articles. Where the Submitting Author wishes to make the Work available on an Open Access basis (and intends to pay the relevant APC), the terms of reuse of such Open Access shall be governed by a Creative Commons licence – details of these licences and which [Creative Commons](#) licence will apply to this Work are set out in our licence referred to above.

Other than as permitted in any relevant BMJ Author's Self Archiving Policies, I confirm this Work has not been accepted for publication elsewhere, is not being considered for publication elsewhere and does not duplicate material already published. I confirm all authors consent to publication of this Work and authorise the granting of this licence.

1  
2  
3 **How do National Health Services (NHS) Organisations respond to patient concerns? A**  
4 **qualitative interview study of the Patient Advice and Liaison Service (PALS)**  
5

6  
7 Dr Keegan Shepard<sup>1</sup>, Dr Ruta Buivydaite<sup>1</sup>, Prof Charles Vincent<sup>1</sup>  
8  
9

10  
11  
12  
13  
14  
15  
16  
17  
18 Correspondence:

19 Dr Ruta Buivydaite

20 Department of Experimental Psychology, University of Oxford, Radcliffe House, Radcliffe  
21 Observatory Quarter, Woodstock Road, Oxford, OX2 6GG UK

22 Email: [ruta.buivydaite@psy.ox.ac.uk](mailto:ruta.buivydaite@psy.ox.ac.uk)  
23  
24

25 <sup>1</sup> Department of Experimental Psychology, University of Oxford, Radcliffe House, Radcliffe  
26 Observatory Quarter, Woodstock Road, Oxford, OX2 6GG UK  
27

28 **Key Words:** Patient Concerns, complaints management, patient satisfaction, organisational  
29 learning  
30

31  
32 **Word Count:** 4398  
33  
34  
35  
36  
37  
38  
39  
40  
41  
42  
43  
44  
45  
46  
47  
48  
49  
50  
51  
52  
53  
54  
55  
56  
57  
58  
59  
60

## ABSTRACT

### Objectives

To describe the current work of the Patient Advice and Liaison Service (PALS) and assess the service's potential to resolve concerns and contribute to organisational learning.

### Design

A qualitative study using semi-structured interviews.

### Setting

Four mental health trusts and four acute trusts in the English NHS. Total of eight PALS services across different trusts.

### Participants

Twenty-four participants comprising of PALS staff as well as clinicians in healthcare setting.

### Methods

Semi-structured interviews were undertaken with participants using video conferencing software. The Framework Method was used for the analysis of the large qualitative dataset, which is a conventional method of analysis, similar to thematic or qualitative content analysis.

### Results

PALS teams fulfil their core responsibilities by acting as point of contact for patients, providing information and resolving a variety of recurrent problems, including PALS staff communication, staff attitudes and waiting times. The remit and responsibilities of each PALS service has often broadened over time. Barriers to resolving concerns included a lack of awareness of PALS, limited to no policies informing how staff resolve concerns, an emphasis on complaints and the attitude of clinical staff. Senior management had widely differing views on how the PALS service should operate and the management of complaints is a much higher priority. Few PALS teams carried out any analysis of the data or shared data within their organisations.

### Conclusions

PALS teams fulfil their core responsibilities by acting as point of contact for patients, providing information and resolving concerns. PALS staff also act as navigators of services, mediators between families and staff and on occasion act as patient advocates in supporting them to raise concerns. PALS has the potential to reduce complaints, increase patient satisfaction and provide rapid organisational feedback. Achieving this potential will require more awareness and support within organisations together with update national policy guidance.

### Strengths and limitations of this study

- To our knowledge, this is the only study of PALS in the last decade.
- We were able to talk in depth both to PALS teams and to clinicians and managers who worked with those teams to gain a rich picture of the work of PALS and the challenges they face.
- The study sites were spread widely across England and involved acute, mental health organisations.
- This qualitative study should however be considered only as an initial exploration of the work of PALS. We cannot be sure how frequently PALS teams succeed in resolving concerns or how their wider patient engagement and training of staff has been received.
- PALS teams within each NHS Trust nominated a clinician for inclusion in the study, which may have had an influence on the results. The clinicians interviewed were nurses, a midwife and two service managers, however, no physicians were interviewed in this study.

## INTRODUCTION

1  
2  
3 While patients are generally very positive about the care they receive, many patients have  
4 concerns about their care, whether or not they choose to raise these formally as complaints or  
5 claims<sup>1-7</sup>. Serious adverse outcomes are more likely to lead to patients using the formal pathways  
6 to raise complaints or litigation; however, many other factors, such as whether patients receive  
7 apologies and explanations, are also critically important in determining how patients and families  
8 respond<sup>8</sup>. Patient concerns which go unaddressed, may lead to patients being reluctant to return  
9 to a healthcare organisation and being less likely to follow the guidance of medical professionals  
10  
11  
12<sup>9 10</sup>.

13  
14 Patients, families and friends can raise concerns about their care with the Patient Advice and  
15 Liaison Service (PALS), which is provided in every National Health Service (NHS) Trust in  
16 England (*Box 1*)<sup>11</sup>. The service was first established in 2002 with the primary aim of supporting  
17 patients and families in raising concerns, and this focus has remained unchanged at the policy  
18 level<sup>11</sup>. PALS maintains a presence within every NHS Trust and provides services in person, by  
19 email, post and telephone. PALS teams have core duties established nationally (*Box 1*) but are  
20 free to decide how to discharge these responsibilities<sup>11</sup>. The approach of individual PALS teams  
21 depends on a variety of factors, including the population they serve, their level of funding and the  
22 approach taken by senior leadership in defining their local roles and responsibilities<sup>12-14</sup>.

23  
24  
25  
26 *Box 1. Description of PALS and its responsibilities*

27  
28  
29 *Key definitions:*

- 30 ● PALS - offers confidential advice, support and information on health-related matters. They  
31 provide a point of contact for patients, their families and their carers<sup>15</sup>
- 32 ● Be noticeable and accessible within their NHS Trust
- 33 ● NHS Trust – is an organisational unit within the National Health Service in England and  
34 Wales, generally serving either a geographical area or a specialised function. In any  
35 particular location there may be several trusts involved in the different aspects of providing  
36 healthcare to the local population<sup>15</sup>

37  
38 *Key responsibilities:*

- 39 ● Listen to the concerns, questions and comments raised by patients, carers, families and  
40 friends concerning their care or treatment
- 41 ● Provide helpful support, as well as accurate information and advice to resolve issues and  
42 concerns as quickly as possible
- 43 ● Assist NHS staff who are raising a concern on behalf of patients, which may involve liaising  
44 with other sites and healthcare organisations
- 45 ● Provide information and advice to individuals wishing to raise a formal complaint

46  
47  
48  
49  
50  
51  
52  
53  
54  
55  
56  
57  
58  
59  
60  
11

Although the service existed for almost two decades, there are very few studies of its activities or effectiveness. This is surprising given the longstanding concern with the level of complaints and litigation and the potential of PALS services to resolve concerns at an early stage. Evans, et al.<sup>14</sup> found that service users reported a high level of satisfaction with PALS even when their preferred outcome was not realised. They suggested that the service had the potential to reduce

1  
2  
3 complaints and was extremely cost-effective for the NHS. Since this report in 2008, the PALS  
4 service has continued to operate with almost no external review or account of how the service  
5 has evolved in the two decades since its inception <sup>14</sup>.  
6

7  
8 This study aimed to describe the current work of PALS and to make a preliminary assessment of  
9 the potential of the service to resolve concerns and to facilitate learning from patient concerns. In  
10 particular, we aimed to explore: (1) The role of the PALS team (2) the nature and response to  
11 concerns brought to PALS; (3) barriers and facilitators of concerns resolution and (4) how PALS  
12 data is used for wider learning within the host organisation.  
13  
14  
15  
16  
17  
18  
19  
20  
21  
22  
23  
24  
25  
26  
27  
28  
29  
30  
31  
32  
33  
34  
35  
36  
37  
38  
39  
40  
41  
42  
43  
44  
45  
46  
47  
48  
49  
50  
51  
52  
53  
54  
55  
56  
57  
58  
59  
60

For peer review only

## METHODS

### Design

The interviews were analysed using a well-established approach (Framework method) described below<sup>16</sup>. The data collection method of semi-structured interviews was utilised with members of PALS teams and clinicians who worked with those teams.

### Participants

We purposively selected eight NHS Trusts, four mental health and four acute, spread widely across England. While we did not intend to make formal comparisons between acute and mental health PALS teams, we were concerned to capture the range of PALS activities in a diverse group of Trusts. PALS teams were initially sent a description of the study and then contacted to discuss the study and invite them to participate. We asked to interview the PALS Lead or Manager, and for them to nominate a PALS Officer and clinician familiar with their work. Participants were informed that the purpose of the study was to explore how organisations can best respond to patient concerns. All participants approached agreed to participate and none dropped out of the study.

We interviewed three people within each NHS Trust, a PALS Manager, PALS Officer, or their equivalents, and a clinical member of staff suggested by the PALS manager, representing a total of 24 participants. Clinical participants all had substantial experience of resolving patient concerns and experience of working with the PALS team. Five of the clinicians were nurses, one a midwife and two service managers. A sampling frame by NHS Trust and role can be found in the table below.

*Table 1. Sampling Frame by NHS Trust and Role*

|                                  | PALS Managers<br>(N = 8) | PALS Officers<br>(N = 8) | Clinicians<br>(N = 8) |
|----------------------------------|--------------------------|--------------------------|-----------------------|
| Acute NHS Trusts (N = 4)         | 4                        | 4                        | 4                     |
| Mental Health NHS Trusts (N = 4) | 4                        | 4                        | 4                     |

### Development of semi-structured interview

The interview schedule development was informed by a literature review, three pilot interviews, and discussion with Patient Advisors (Appendix I). The interview addressed a range of different topics, including the role of PALS teams, policies and guidance outlining their responsibilities, relationship between PALS and clinical staff, patient and staff awareness, barriers to resolving concerns, data collection and analysis and recommendations to improve going forward. Phrasing of specific questions varied slightly across the three types of participants' but covered the same core content.



Participants were offered their preference of video conferencing software, including Microsoft Teams, Zoom and Skype, as well as an option to conduct the interview over the phone. In total, 24 semi-structured interviews were conducted between July and October 2020, lasting an average of 41 minutes each. Data saturation was reached after interviewing the participants from the 7<sup>th</sup> trust, however we continued interviewing as we aimed to have 8 trust in total (4 mental health and 4 acute).

## Data analysis

Interviews were audio-recorded, transcribed verbatim and anonymised, before being uploaded onto © 2018 QSR International's NVivo 12 Software. The interviews were stored on password protected university computers. The seven stages of the Framework Method of data analysis were adhered to throughout the processes of analysis<sup>17</sup>. Following familiarisation with the interviews, the process of coding was carried out with the first four transcripts to develop an initial analytical framework. Notes taken during and after interviews assisted in the identification of core themes. Any salient emergent categories were grouped into subdominant themes, which were subsequently grouped into broader dominant themes. The coding framework was reviewed and refined by the authors in successive iterations, before being reapplied to new transcripts, and further refined to produce the final coding framework (table 2).

*Table 2: Stages in the Framework Method of Data Analysis*

| Stage | Procedure                        |
|-------|----------------------------------|
| 1     | Transcribing interviews          |
| 2     | Familiarisation with transcripts |
| 3     | Coding transcripts               |
| 4     | Developing analytical framework  |
| 5     | Applying analytical framework    |
| 6     | Tabulating data in matrix        |
| 7     | Interpreting data                |

<sup>17</sup>

The full data set was then tabulated in a matrix, which presented the data in a visually accessible and navigable format. A key feature of the Framework Method is the matrix output, which was pivotal in the identification of subdominant and dominant themes. Data analysis was carried out by one author (KS), with additional double coding of a sample of interviews (RB) to ensure consistency of coding and interpretation. The two analysts had no prior connection with PALS, had never used the PALS service and this was their first encounter with the service.

The initial results were shared with the participants, they provided the feedback, but the original themes remain. No major changes were made to the findings or further interviews undertaken.

## Participant anonymization

1  
2  
3 The participant's quotes were anonymised using the agreed coding method. Alphabetical letters  
4 were given to each participant and the number for their level of seniority: 1 is PALS Manager, 2  
5 is PALS Officer and 3 is the Clinician. Each trust was given letter T and a number. Thus, [D1, T3]  
6 represents a PALS Manager from Trust 3.  
7

## 8 9 **Patient and public involvement**

10  
11 Two Patient and Public Involvement (PPI) Lay Research Advisors from the Quality, Safety and  
12 Outcomes Policy Research Unit ([www.qso.ac.uk](http://www.qso.ac.uk)) reviewed the design of study, the materials  
13 used, including the interview schedules, and provided comments on the findings.  
14  
15

## 16 **Ethics**

17  
18  
19 The study was assessed and categorised as a service evaluation by the local ethics committee.  
20 All participants provided written informed consent to take part in the interviews.  
21

## 22 **RESULTS**

23  
24  
25 A total of 24 participants, including eight PALS Managers, eight PALS Officers, or their  
26 equivalents, and eight healthcare staff working with PALS teams, were interviewed. Four  
27 dominant themes emerged from the analysis: the Role of PALS, Concerns and their Resolution,  
28 Barriers to Resolution, and Learning from Concerns. Common themes were found across mental  
29 health and acute Trusts, although the nature of concerns raised naturally varied in different  
30 contexts. For simplicity, we use the word 'patient' to broadly indicate the person raising the  
31 concern, while being aware that this may be a friend or family member, as well as that the term  
32 'service-user' is more commonly used in mental health organisations.  
33  
34  
35

### 36 **The role of PALS**

37  
38 PALS acts as a point of contact for patients and service-users, to answer questions and respond  
39 to whatever concerns they have. PALS staff frequently contact clinicians to seek information and,  
40 where necessary, seek help in resolving conflicts or misunderstandings that have arisen. Where  
41 necessary, they also provide information to those wishing to submit a formal complaint.  
42  
43

44 Patients have the option to '*see them in person, on the telephone, email*' [D1-T4], as well as  
45 through post and social media in most NHS Trusts. There was no consensus from participants  
46 on which group, clinicians or PALS, was better for resolving concerns, as '*it depends on the*  
47 '*concern*' [E2-T5] and '*there are pros to both*' [H3-T8].  
48  
49

50 PALS clearly continues to provide the services set out in the original policies and guidance.  
51 However, the PALS service has evolved in different ways in each Trust and their remit and  
52 responsibilities have often broadened considerably beyond their core duties. For instance, some  
53 teams were very visible, with the PALS office in a central location in the Trust and a PALS  
54 receptionist available at the front desk. Some PALS officers, rather than waiting for concerns to  
55  
56  
57  
58  
59  
60

1  
2  
3 come to them, would proactively engage with patients, helping them navigate their care  
4 pathways and acting in support of patients when they have an issue with a clinician  
5

6  
7 *'I'm here for the patients, I'm happy to help anybody as much as I can. And, you know,*  
8 *and I hope I do a good job at the same time [B2, T3].*  
9

10 A small number of PALS teams provided training to clinical staff on how to resolve concerns.  
11 Most frequently, PALS teams described how they were used as a 'catch-all service' [E1-T5],  
12 functioning more as a last resort and 'handle loads more than just patient concerns' [E2-T5].  
13

14  
15 *'We are asked to do certain things like, I don't know, take on crisis calls, or ask to get in*  
16 *touch with patients, to give them updates about their care and things like that that, you*  
17 *know, no other team is willing to do.'* [E2-T5]  
18

19  
20 *'Their remit is to be that jam in the sandwich, if you like. So they are the portal. So when*  
21 *families or anybody make contact with a trust, that they are a way in, a route in, a funnel,*  
22 *if you like, for any concerns or questions or requests in any form.'* [B1-T2]  
23

24  
25 According to many participants, this catch-all service role resulted from a lack of clear guidance  
26 and definition of their role within each Trust and a lack of awareness of national policy on the  
27 part of senior staff in their respective Trusts.  
28

## 29 **Resolution of concerns**

30  
31 *What concerns do patients have?*  
32

33  
34 PALS staff reported that most patient concerns related to communication, staff attitudes and  
35 waiting times. Clinicians saw these same concerns frequently but emphasised that  
36 communication and clarity about discharge plans were the most frequent concerns.  
37

38 *'A lot of them are about how long people have had to wait for appointments, that's one of*  
39 *the big concerns that comes through all the time. Another one is communication, actually,*  
40 *and how people hear things that doctors have said, or not hear them, that doctors have*  
41 *said to them or the way they've spoken to them, or you're not getting answers that they*  
42 *wanted to hear.'* [D1-T4]  
43

44 *'Nine times out of ten, it's regarding discharge. It could be anything from discharges,*  
45 *having to wait for such a long time for their letters or their tablets to go home.'* [B3-T2]  
46

47 *'A lot of it is just about communication and attitude and not getting answers when they*  
48 *want answers.'* [C3-T3]  
49

50  
51 Clinical staff and managers were clear that they saw resolving concerns as a legitimate part of  
52 their role, but that it required skills that not everyone has necessarily developed.  
53

54 *'I think it's about using your skills that you might have developed as a clinician in terms*  
55 *of engagement, listening and so on and so forth. And just recognising that you've got*  
56  
57

1  
2  
3 *that skill set, it's just turning it into a different function, you know, for a different outcome.'*  
4 [I3-T9]  
5

6 *When does PALS become involved?*  
7

8 Patients may come to PALS because they have not been able, for whatever reason, to resolve  
9 their concern or problem with clinical staff. Patients sometimes however approach PALS direct,  
10 without first discussing their concern with clinical staff or managers. They may believe that raising  
11 their concern will have a negative impact on relationships with people caring for them or on their  
12 treatment. Clinicians who are aware of PALS may also contact the service directly or signpost  
13 the patient to PALS, if concerns cannot be resolved locally.  
14

15  
16 Once contacted, PALS teams all appeared to follow a structured process, where they liaise with  
17 the patient and clinician to find a solution to the problem presented.  
18

19 *'A concern is received via email or by phone, and the PALS Officer will establish what*  
20 *the concern is. If it's very straightforward, they'll act upon it straightaway. If it's not*  
21 *straightforward, they'll need to contact the patient and then discuss what outcomes*  
22 *they're seeking. Once they understand, or believe that they understand, fully well what*  
23 *the outcome is that they're asking for, they'll take action.'* [C1-T3]  
24

25 PALS staff found it difficult to specify a precise series of steps that they took to resolve concerns  
26 saying that it depended very much on the nature of the concern and the relationships they had  
27 established with clinical staff involved. PALS staff are often able to find information for a patient  
28 simply because they know who to contact and how to contact them. They act as 'navigators' of  
29 the healthcare system and sometimes, more forcefully, as advocates for patients where a firmer  
30 approach is required.  
31

32  
33 The principal strengths of PALS were that they had more experience and 'a particular skill set'  
34 [F1-T6] for resolving concerns, and that they are an impartial third party, acting as a mediator  
35 between clinicians and service-users.  
36

37 *'We're slightly removed, separate from that department. We are employed by the trust.*  
38 *But we're more like a third party that patients like so they don't feel like it's them versus*  
39 *the clinicians and NHS, you know, we're their back-up and mouthpiece.'* [A2-T1]  
40

41 PALS staff do however need time to familiarise themselves with a particular ward, for instance, to  
42 better understand what happened and who was involved.  
43

44 *'I think what becomes very tricky is if somebody external is investigating a complaint*  
45 *about the complex needs service and don't know how the service works.'* [F3-T6]  
46

47 Despite their different roles, all participants agreed that resolving concerns informally was  
48 preferable to resolving formal complaints, as the former requires fewer resources from the NHS  
49 Trust and provides the service-user with a much faster resolution.  
50

51 *'The idea of PALS is that hopefully we can resolve things quicker so we can just walk*  
52 *up to a ward and see someone or we can go and chat to the ward sister or send a quick*  
53 *email or do a quick phone call. Whereas the complaints process is, you know, three*  
54 *days to acknowledge, 25 working days to respond.'* [A2-T1]  
55  
56  
57

## Barriers to resolution of concerns

Participants described several barriers that restrict the ability of both PALS and clinicians to resolve informal concerns within their Trusts.

### *Lack of Awareness*

The most significant barrier was the perception in all eight Trusts of a widespread lack of awareness of PALS and the services that they provide.

*'In my experience, clinical teams have a really bad understanding of what PALS is and what PALS does.'* [E2-T5]

*'They're only aware of them, really, if they've used them before or we inform them. There are posters up, you know, if you go to any ward at the moment, there's posters up about everything. And if you're sick in bed, you're not going to be reading those posters in reality. So, yes, it's up to us to inform them.'* [A3-T1]

In some cases the location of PALS teams within NHS Trusts, contributed to lack of patient awareness. While the majority of PALS teams within acute NHS Trusts had offices that were accessible to patients and located near a waiting area, while PALS teams in mental health NHS Trusts were largely inaccessible and patients could only reach them by phone, letter or email, thereby reducing awareness.

*'I think from a patient or person coming to PALS, I don't think people are clear on what actually we do. So I think if you go into an acute service hospital, you're going to usually an office where it says PALS.'* [I1-T9]

### *Lack of Policies and Guidance Informing their Application*

Most PALS services did not have clear policies or guidance within their Trusts defining the scope of their role and responsibilities of the team. Some staff questioned their individual role and wished for some written guidelines.

*'I'm not really sure what my role is properly at the moment.'* [I1-T9]

*'There needs to be some guidance for trusts to actually deliver what PALS really should be about.'* [A1-T1]

Some participants noted that the lack of policies and guidance increased the variability of PALS teams across England and led to the misuse of PALS within some Trusts.

*'It makes me quite sad when I hear about other trusts, when they are using PALS in a way that I just don't feel is appropriate. I don't feel it's the right way...and I'm certainly not saying we're perfect. Far from it.'* [A1-T1]

### *Emphasis on complaints*

Senior staff in all organisations paid much more attention to complaints than concerns, because complaints handling is a *'regulated service'* [A1-T1] that is monitored by regulators. This led to a lack of understanding and appreciation of the role and value of PALS.

1  
2  
3  
4 *'PALS does get overlooked and that happens within our trust.'* [E2-T5]  
5

6 *'It felt very much like that PALS was a lower step down from complaints.'* [D2-T4]  
7

8 Participants believed that this emphasis on complaints sometimes led to clinicians directing  
9 patients to submit a formal complaint, when PALS could have resolved the concern instead  
10 informally.  
11

12 *'We have some consultants who feel that PALS is an unnecessary link in the chain*  
13 *and think "I'll address it and if I can't address it, then complaints will address it.'* [D2-T4]  
14

### 15 *Attitude and unavailability of Clinical Staff*

16

17  
18 Some clinicians distrust PALS and view working with the service as an unnecessary and time-  
19 consuming activity.  
20

21 *'You do find that staff think of you as kind of a negative and you don't get a good vibe*  
22 *all the time. They don't see us as a help, they see us as kind of a hindrance.'* [B2-T2]  
23

24 Many clinicians however, view PALS in a positive light but simply do not have time to liaise  
25 effectively. PALS staff often cannot find specific clinicians due to a lack of updated contact details.  
26

27 *'It's getting hold of the person who can solve the problem for us. You know, we can email*  
28 *a consultant, but he may not be able to get to his emails for a little while.'* [D1-T4]  
29

30 *'Our services change every day, you know, people are moving in posts, you know,*  
31 *different managers, different services. Managers will move between services. Services*  
32 *will open and close. And no one will tell us. We have no way of knowing at all what*  
33 *services are open, what services are not, who's managing which service.'* [E2-T5]  
34  
35

### 36 **Learning from concerns**

37

38 While the principal remit of PALS is the resolution of individual concerns, there is clearly potential  
39 for reflecting on those concerns and wider learning and improvement. Incident reports and  
40 complaints are routinely reviewed to provide feedback and stimulate learning and improvement,  
41 and the same could be done for PALS data.  
42

#### 43 *What data is collected?*

44

45 PALS team varied widely in the collection of data. Some teams had established a robust  
46 approach, assigning specific categories to informal concerns, recording who was involved,  
47 relevant dates and the outcome. Other teams simply record a general description of the concern.  
48

49 *'We have a whole host of codes that we use, including, for example, communication,*  
50 *lost property. So it's not what we think. So we don't think, 'well I don't think it was a staff*  
51 *member was rude', it is what the patient thinks.'* [C2-T3]  
52

53 *'There aren't really any categories, so it's a complaint or a PALS inquiry or it's a local*  
54 *resolution. And then the detail of that complaint is just our account of it. So there's not a*  
55 *pull-down bar that says "it's this category, or that category, whatever.'* [I1-T9]  
56  
57

1  
2  
3  
4 *What is done with the data?*  
5

6 Few PALS teams or their organisations carried out any analysis of the data collected or reflected  
7 on the many patient concerns collected.  
8

9 *'We're not analysing...all we're doing at the moment is counting the numbers. And the*  
10 *most detailed analysis that we do, which is all off of an Excel spreadsheet, is the number*  
11 *of days to completion.'* [I1-T9]  
12

13 A recurring theme from the interviews was that there was no interest from senior Trust staff in the  
14 patient concerns data. All the emphasis is on formal complaints data.  
15

16 *'The data that we produce has always been an addendum, really an appendix to the*  
17 *complaints material.'* [E1-T5]  
18

19 *'At those meetings they talk about complaints, but they don't really ask what's going on,*  
20 *what the trends are.'* [I1-T9]  
21  
22

23 Participants acknowledged that there was no learning from informal concerns within their NHS  
24 Trust, and that the data was not shared beyond their organisation.  
25

26 *'This may be shocking to you, as I wish I could say "Oh, yeah, PALS has done this and*  
27 *PALS has done that and we've affected loads of changes". As far as I'm concerned. No,*  
28 *we haven't.'* [E1-T5]  
29

30 *'PALS data doesn't really get shared beyond the organisation, because there isn't that*  
31 *requirement.'* [C1-T3]  
32  
33

34 Participants understood the potential for PALS data to be used as an 'early warning system' [E1-  
35 T5]. Patients tend to raise informal concerns immediately, whereas complaints may be raised  
36 months after an incident.  
37

38 *'One of the things about PALS is that obviously it's pretty much real time feedback,*  
39 *whereas complaints is often delayed. People sometimes don't raise the complaint until*  
40 *a year after it's happened or six months or three months or whatever.'* [C1-T3]  
41  
42  
43  
44  
45  
46  
47  
48  
49  
50  
51  
52  
53  
54  
55  
56  
57  
58  
59  
60

## DISCUSSION

PALS was established to provide support, information and advice to patients and families and to resolve their concerns in a timely manner. PALS teams interviewed in this study are certainly fulfilling these core responsibilities. The PALS service has however evolved in different ways in each Trust and their remit and responsibilities have often broadened considerably beyond their core duties. Many of the teams have become a kind of 'catch all' service taking on any patient liaison work not allocated elsewhere. Most participants reported that senior managers within their Trusts seemed largely unaware of the core national responsibilities of PALS and, even within Trusts, had widely differing views on how the PALS service should operate. A recurring theme was that complaints were given much higher priority and that little interest was shown in the work of PALS. All staff agreed that interventions by PALS had the advantage of being much quicker, less burdensome to both patients and staff and more personal in nature than the formal complaints process.

PALS staff appear to adopt multiple different roles according to the needs of patient and families. They certainly fulfil their core role of providing support, advice and information to patients. However, some other activities also emerged at points in the interviews. At times PALS staff also appear to act as navigators of services, mediators between families and staff and occasionally also to act as patient advocates in supporting them to raise concerns<sup>18-21</sup>. The role of navigator is particularly critical as patients often experience services as complex and not well integrated<sup>22-24</sup>. PALS staff are therefore providing important support to patients and families and, when successful, are potentially helping the efficient running of their organisations, restoring trust and reducing the likelihood of complaints and other problems. These findings echo those of earlier studies and show that PALS teams continue to succeed in fulfilling their national policy mandate<sup>14 25</sup>. We cannot of course, from this study, assess how often PALS staff adopt each of these roles or how often their intervention produces a successful outcome. However, they clearly do provide support to patients and families in a variety of ways, which appear not fully appreciated by their host organisations.

Most participants believed that PALS could achieve much more if the services were given more support and resource by senior management. Even within existing resources however, there is scope to develop the PALS service by sharing examples of innovation across PALS teams. PALS services could, for instance, be advertised much more widely in NHS organisations, in particular informing clinicians that PALS can support them as well as their patients<sup>26</sup>. Some PALS staff are much more active than others; visiting wards to talk to patients, engage with staff and pre-empt potential problems. Visiting wards is easier in acute Trusts which tend to be located on a small number of main sites, whereas mental health Trusts may be spread across multiple locations. We do not know how effective or cost-effective this is, and PALS services do not appear to record this activity, but this enhanced role should certainly be explored. Some PALS teams were more proactive still in providing training to clinical staff on how to communicate effectively and resolve patient concerns at source.



1  
2  
3 There is currently no requirement on PALS teams to collect data or any guidance for them on how  
4 this might be done. Yet concerns data represent a rich source of information, potentially timelier  
5 and more sensitive to patient experience than data from complaints <sup>1</sup>. It would be relatively  
6 straightforward to produce a national framework for the recording and classification of patient  
7 concerns, which should have a strong emphasis on recording actions taken and outcomes <sup>27 28</sup>.  
8 The existing framework for complaints, could be modified for less serious problems <sup>29</sup>. This would  
9 allow organisations to learn from concerns and, equally important, allow wards and hospital  
10 services to monitor patient concerns near real time <sup>1 14</sup>. This is particularly useful for detecting  
11 clusters of problems or a sudden escalation of problems in a particular area, which would be  
12 revealed much more quickly in PALS data than in complaints systems.  
13  
14  
15

### 16 **Strengths and limitations**

17  
18  
19 This study is one of the very few to examine the role of PALS and the potential of services of this  
20 kind to resolve patient concerns and contribute to learning. To our knowledge, this is the only  
21 study of PALS in the last decade. We were able to talk in depth both to PALS teams and to  
22 clinicians and managers who worked with those teams to gain a rich picture of the work of PALS  
23 and the challenges they face. The study sites were spread widely across England and involved  
24 acute, mental health organisations. This qualitative study should however be considered only as  
25 an initial exploration of the work of PALS. In particular we cannot be sure how frequently PALS  
26 teams succeed in resolving concerns or how their wider patient engagement and training of staff  
27 has been received.  
28  
29  
30

### 31 **CONCLUSIONS**

32  
33 PALS teams fulfil their core responsibilities by acting as a point of contact for patients, providing  
34 information and resolving a variety of recurrent problems. The remit and responsibilities of each  
35 PALS service has often broadened considerably over time. Senior healthcare management had  
36 widely differing views on how the PALS service should operate and viewed complaints as having  
37 a much higher priority. Few PALS teams carried out any analysis of collected data or shared data  
38 within their organisations. The role of PALS teams, with their focus on early resolution of concerns  
39 and potential problems, could be enhanced which could potentially increase patient satisfaction  
40 and reduce the need for patients to make formal complaints.  
41  
42  
43  
44  
45  
46  
47  
48  
49  
50  
51  
52  
53  
54  
55  
56  
57  
58  
59  
60

## Acknowledgements

The authors would like to thank the eight participating NHS Trusts in England, as well as the kind PALS staff and clinicians who all gave their time during a pandemic to contribute to this service evaluation. In addition, the authors would like to thank the two Patient and Public Involvement (PPI) Lay Research Advisors, provided by the Quality, Safety and Outcomes Policy Research Unit (QSO-PRU), who all enriched the quality of the service evaluation by contribution their unique and important perspectives. We thank Jules Forder, Ray Fitzpatrick and Helen Hogan for comments on an earlier draft of this manuscript.

## Author Affiliations

KCS, CV and RB are affiliated with the University of Oxford.

## Contributors

KCS and CV conceived the service evaluation and all authors contributed to its design. KCS carried out all of the data collection. RB and KCS carried analysis, while CV extensively supervised and provided support during the process. KCS and RB drafted the manuscript, and all of the authors reviewed and agreed on the current version.

## The research team

RS and KS has used qualitative methodology throughout their doctoral researcher. They both had extensive qualitative methods training during their studies in their respective Universities. CV has supervised many qualitative studies but received no formal training in qualitative methods.

## Funding

This study was funded by the National Institute for Health Research (NIHR) Policy Research Programme, conducted through the Quality, Safety and Outcomes Policy Research Unit, PR-PRU-1217-20702. The views expressed are those of the author(s) and not necessarily those of the NIHR or the Department of Health and Social Care.

## Competing Interests

None declared.

## Patient Consent

This research was classified as service evaluation therefore we followed the typical protocols of such research and patient consent was not required.

## Data sharing statement

The transcripts and original interviews will not be shared as permission from participants was not granted.

**Ethics Statement**

This project has been reviewed by the Joint Research Office study classification group. It was determined that the activity described is best understood as a service evaluation. As such, it is not subject to the Department of Health's UK Policy Framework for Health and Social Care Research (2017). It requires neither sponsorship nor research ethics review.

For peer review only

## References

1. Anderson WG, Winters K, Auerbach AD. Patient concerns at hospital admission. *Arch Intern Med* 2011;171(15):1399-400. doi: 10.1001/archinternmed.2011.337 [published Online First: 2011/08/10]
2. Commission CQ. Survey Finds Most Patients Are Positive About Their Hospital Care, But Many Still Experience Delays When They Leave. In: Commission CQ, ed. Online, 2017.
3. Heyn L, Ruland CM, Finset A. Effects of an interactive tailored patient assessment tool on eliciting and responding to cancer patients' cues and concerns in clinical consultations with physicians and nurses. *Patient Educ Couns* 2012;86(2):158-65. doi: 10.1016/j.pec.2011.04.024 [published Online First: 2011/05/20]
4. Mjaaland TA, Finset A, Jensen BF, et al. Patients' negative emotional cues and concerns in hospital consultations: a video-based observational study. *Patient Educ Couns* 2011;85(3):356-62. doi: 10.1016/j.pec.2010.12.031 [published Online First: 2011/03/12]
5. Mulcahy L, Tritter JQ. Pathways, Pyramids and Icebergs? Mapping the Links Between Dissatisfaction and Complaints. *Sociology of Health & Illness* 1998;20(6):825-47. doi: <https://doi.org/10.1111/1467-9566.00131>
6. O'Hara JK, Reynolds C, Moore S, et al. What can patients tell us about the quality and safety of hospital care? Findings from a UK multicentre survey study. *BMJ Quality & Safety* 2018;27(9):673-82. doi: 10.1136/bmjqs-2017-006974
7. Williams B. Patient satisfaction: A valid concept? *Social Science & Medicine* 1994;38(4):509-16. doi: [https://doi.org/10.1016/0277-9536\(94\)90247-X](https://doi.org/10.1016/0277-9536(94)90247-X)
8. Vincent C, Young M, Phillips A. Why do people sue doctors? A study of patients and relatives taking legal action. *Lancet* 1994;343(8913):1609-13. doi: 10.1016/s0140-6736(94)93062-7 [published Online First: 1994/06/25]
9. Burroughs TE, Waterman AD, Gallagher TH, et al. Patients' concerns about medical errors during hospitalization. *Jt Comm J Qual Patient Saf* 2007;33(1):5-14. doi: 10.1016/s1553-7250(07)33002-x [published Online First: 2007/02/08]
10. Burroughs TE, Waterman AD, Gallagher TH, et al. Patient concerns about medical errors in emergency departments. *Acad Emerg Med* 2005;12(1):57-64. doi: 10.1197/j.aem.2004.08.052 [published Online First: 2005/01/07]
11. Heaton J, Sloper P, Clarke S. Access to and use of NHS Patient Advice and Liaison Service (PALS): the views of children, young people, parents and PALS staff. *Child: Care, Health and Development* 2008;34(2):145-51. doi: <https://doi.org/10.1111/j.1365-2214.2007.00749.x>
12. Abbott S, Rnt J, Rhv J, et al. Patient Advice and Liaison Services: strengthening the voices of individual service users in health-care organizations. *Health Expectations* 2006;9:138-47. doi: 10.1111/j.1369-7625.2006.00384.x
13. Heaton J, Sloper P. National survey of Patient Advice and Liaison Services (PALS) in England: children, young people and parents' access to and use of PALS. *Child: Care, Health and Development* 2004;30(5):495-501. doi: <https://doi.org/10.1111/j.1365-2214.2004.00444.x>
14. Evans D, Booker S, Day N, et al. National Evaluation of Patient Advice and Liaison Services (PALS). Final Report. online: University of the West of England, 2008:1-324.
15. Services NH. What is PALS (Patient Advice and Liaison Service)? 2021 [Available from: <https://www.nhs.uk/nhs-services/hospitals/what-is-pals-patient-advice-and-liaison-service/> accessed 28-08-2021 2021.
16. Merriam SB, Merriam SB. Qualitative research : a guide to design and implementation. San Francisco: Jossey-Bass 2009.

17. Gale NK, Heath G, Cameron E, et al. Using the framework method for the analysis of qualitative data in multi-disciplinary health research. *BMC Medical Research Methodology* 2013;13(1):117. doi: 10.1186/1471-2288-13-117
18. Tho PC, Ang E. The effectiveness of patient navigation programs for adult cancer patients undergoing treatment: a systematic review. *JBI database of systematic reviews and implementation reports* 2016;14(2):295-321. doi: 10.11124/jbisrir-2016-2324 [published Online First: 2016/08/19]
19. Ellen ME, Shach R, Balicer RD. Helping patients help themselves: Supporting the healthcare journey. *Patient Education and Counseling* 2018;101(9):1708-11. doi: <https://doi.org/10.1016/j.pec.2018.04.005>
20. Kelly KJ, Doucet S, Luke A. Exploring the roles, functions, and background of patient navigators and case managers: A scoping review. *International journal of nursing studies* 2019;98:27-47. doi: 10.1016/j.ijnurstu.2019.05.016 [published Online First: 2019/07/05]
21. Gilbert JE, Green E, Lankshear S, et al. Nurses as patient navigators in cancer diagnosis: review, consultation and model design. *European journal of cancer care* 2011;20(2):228-36. doi: 10.1111/j.1365-2354.2010.01231.x [published Online First: 2010/10/20]
22. Wennberg JE. Time to tackle unwarranted variations in practice. *BMJ* 2011;342:d1513. doi: 10.1136/bmj.d1513
23. Neuhauser D, Provost L, Bergman B. The meaning of variation to healthcare managers, clinical and health-services researchers, and individual patients. *BMJ Qual Saf* 2011;20 Suppl 1(Suppl\_1):i36-40. doi: 10.1136/bmjqs.2010.046334 [published Online First: 2011/04/06]
24. Patient Navigators as Essential Members of the Healthcare Team: A Review of the Literature; 2018.
25. Wessel M, Lynøe N, Juth N, et al. The tip of an iceberg? A cross-sectional study of the general public's experiences of reporting healthcare complaints in Stockholm, Sweden. *BMJ Open* 2012;2(1):e000489. doi: 10.1136/bmjopen-2011-000489
26. Montgomery CM, Chisholm A, Parkin S, et al. Wild data: how front-line hospital staff make sense of patients' experiences. *Sociology of Health & Illness* 2020;42(6):1424-40. doi: <https://doi.org/10.1111/1467-9566.13115>
27. Coulter A, Locock L, Ziebland S, et al. Collecting data on patient experience is not enough: they must be used to improve care. *Bmj* 2014;348:g2225. doi: 10.1136/bmj.g2225 [published Online First: 2014/03/29]
28. Martin GP, McKee L, Dixon-Woods M. Beyond metrics? Utilizing 'soft intelligence' for healthcare quality and safety. *Soc Sci Med* 2015;142:19-26. doi: 10.1016/j.socscimed.2015.07.027 [published Online First: 2015/08/19]
29. Reader TW, Gillespie A, Roberts J. Patient complaints in healthcare systems: a systematic review and coding taxonomy. *BMJ Quality & Safety* 2014;23(8):678-89. doi: 10.1136/bmjqs-2013-002437

## Appendix I

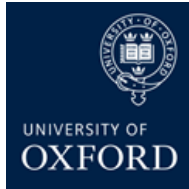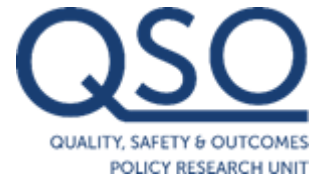

*An exploration of how organisations best respond to patient concerns.*

## Interview Schedule - PALS Officer

### Introduction

*Introduction of self and study (including differentiation between complaints and concerns), and reassurance of measures taken to protect anonymity. Thank them for taking the time to talk about their perceptions of how organisations best respond to patient concerns.*

### Breakdown of Role and PALS

*Immediate or core functions, duties and responsibilities of role and PALS team more generally*

*Perceptions of unique and extra duties and responsibilities of PALS team (surgeries, for example)*

- *Who instigated these changes?*

*Take me through the journey of a patient concern coming in from start to finish*

*How do you think PALS contributes to improving the service more generally?*

- *How could it be changed to help improve the service even more?*

### Policies and Guidance

*Do you have policy documents informing what you do?*

- *Was the development of these informed by other PALS teams or national guidelines?*
- *What is the timeframe to respond to concerns?*

### Relationship with Complaints Team

*What is the relationship between PALS and Complaints within your NHS Trust?*

*What are the strengths and limitations of this dynamic?*

### Patient Awareness

*How do PALS make patients aware of their presence and role?*

### Pathways Available to Patients

*What pathways do patients use to report their concerns?*

- *How does PALS monitor each?*

*How does the pathway used by patients impact the resolution of their concern?*

### Data

Dated: 21/1/2020 – Version 1

1  
2  
3 *What system do you use?*

- 4 - *i.e. Ulysses, Datix, etc.*

5  
6 *Do you do anything with the data?*

- 7 - *If not, how could you implement the learning from concerns?*

### 8 9 **Training**

10 *Do you train or work with staff to help them respond to concerns on the ground?*

- 11 - *If so, could you tell me a bit about your approach?*

### 12 13 **Issues**

14 *What issues, or barriers, are present that you think are restricting your ability to respond to patient*  
15 *concerns?*

### 16 17 **Recommendations**

18 *What recommendations could be made to improve how PALS, or the overall organisation, respond*  
19 *successfully to patient concerns?*

20 *Do you have any suggestions about other ways PALS data and patient experiences and concerns*  
21 *could be used to improve services?*

22  
23 *What would you suggest that researchers focus on to better understand how organisations could*  
24 *become better at responding to patient concerns?*

---

25  
26  
27  
28 ***These topics are a guide to stimulate naturalistic conversation that will be probed further depending on the***  
29 ***responses of each individual participant.***

### 30 31 **Some examples of prompt questions:**

32  
33 Can you tell me a little more about that?

34  
35 How do you explain that?

36  
37 In what way?

38  
39 Can you explain that?

40  
41 How is that?

42  
43  
44  
45  
46  
47  
48  
49  
50  
51  
52  
53  
54  
55  
56  
57  
58 Dated: 21/1/2020 – Version 1

## Standards for Reporting Qualitative Research (SRQR)\*

<http://www.equator-network.org/reporting-guidelines/srqr/>

Page/line no(s).

### Title and abstract

|                                                                                                                                                                                                                                                              |        |
|--------------------------------------------------------------------------------------------------------------------------------------------------------------------------------------------------------------------------------------------------------------|--------|
| <p><b>Title</b> - Concise description of the nature and topic of the study Identifying the study as qualitative or indicating the approach (e.g., ethnography, grounded theory) or data collection methods (e.g., interview, focus group) is recommended</p> | Page 1 |
| <p><b>Abstract</b> - Summary of key elements of the study using the abstract format of the intended publication; typically includes background, purpose, methods, results, and conclusions</p>                                                               | Page 2 |

### Introduction

|                                                                                                                                                                     |        |
|---------------------------------------------------------------------------------------------------------------------------------------------------------------------|--------|
| <p><b>Problem formulation</b> - Description and significance of the problem/phenomenon studied; review of relevant theory and empirical work; problem statement</p> | Page 3 |
| <p><b>Purpose or research question</b> - Purpose of the study and specific objectives or questions</p>                                                              | Page 4 |

### Methods

|                                                                                                                                                                                                                                                                                                                                                                                                             |          |
|-------------------------------------------------------------------------------------------------------------------------------------------------------------------------------------------------------------------------------------------------------------------------------------------------------------------------------------------------------------------------------------------------------------|----------|
| <p><b>Qualitative approach and research paradigm</b> - Qualitative approach (e.g., ethnography, grounded theory, case study, phenomenology, narrative research) and guiding theory if appropriate; identifying the research paradigm (e.g., postpositivist, constructivist/ interpretivist) is also recommended; rationale**</p>                                                                            | Page 5   |
| <p><b>Researcher characteristics and reflexivity</b> - Researchers' characteristics that may influence the research, including personal attributes, qualifications/experience, relationship with participants, assumptions, and/or presuppositions; potential or actual interaction between researchers' characteristics and the research questions, approach, methods, results, and/or transferability</p> | Page 15  |
| <p><b>Context</b> - Setting/site and salient contextual factors; rationale**</p>                                                                                                                                                                                                                                                                                                                            | Page 3-4 |
| <p><b>Sampling strategy</b> - How and why research participants, documents, or events were selected; criteria for deciding when no further sampling was necessary (e.g., sampling saturation); rationale**</p>                                                                                                                                                                                              | Page 5-6 |
| <p><b>Ethical issues pertaining to human subjects</b> - Documentation of approval by an appropriate ethics review board and participant consent, or explanation for lack thereof; other confidentiality and data security issues</p>                                                                                                                                                                        | Page 7   |
| <p><b>Data collection methods</b> - Types of data collected; details of data collection procedures including (as appropriate) start and stop dates of data collection and analysis, iterative process, triangulation of sources/methods, and modification of procedures in response to evolving study findings; rationale**</p>                                                                             | Page 6-7 |



|                       |                                                                                                                                                                                                                                                       |        |
|-----------------------|-------------------------------------------------------------------------------------------------------------------------------------------------------------------------------------------------------------------------------------------------------|--------|
| 1<br>2<br>3<br>4<br>5 | <b>Data collection instruments and technologies</b> - Description of instruments (e.g., interview guides, questionnaires) and devices (e.g., audio recorders) used for data collection; if/how the instrument(s) changed over the course of the study | Page 6 |
| 6<br>7<br>8           | <b>Units of study</b> - Number and relevant characteristics of participants, documents, or events included in the study; level of participation (could be reported in results)                                                                        | Page 5 |
| 9<br>10<br>11<br>12   | <b>Data processing</b> - Methods for processing data prior to and during analysis, including transcription, data entry, data management and security, verification of data integrity, data coding, and anonymization/de-identification of excerpts    | Page 6 |
| 13<br>14<br>15<br>16  | <b>Data analysis</b> - Process by which inferences, themes, etc., were identified and developed, including the researchers involved in data analysis; usually references a specific paradigm or approach; rationale**                                 | Page 6 |
| 17<br>18<br>19<br>20  | <b>Techniques to enhance trustworthiness</b> - Techniques to enhance trustworthiness and credibility of data analysis (e.g., member checking, audit trail, triangulation); rationale**                                                                | Page 6 |

## Results/findings

|                      |                                                                                                                                                                                                   |           |
|----------------------|---------------------------------------------------------------------------------------------------------------------------------------------------------------------------------------------------|-----------|
| 23<br>24<br>25<br>26 | <b>Synthesis and interpretation</b> - Main findings (e.g., interpretations, inferences, and themes); might include development of a theory or model, or integration with prior research or theory | Page 7-12 |
| 27<br>28<br>29       | <b>Links to empirical data</b> - Evidence (e.g., quotes, field notes, text excerpts, photographs) to substantiate analytic findings                                                               | Page 7-12 |

## Discussion

|                                        |                                                                                                                                                                                                                                                                                                                                                                                                             |            |
|----------------------------------------|-------------------------------------------------------------------------------------------------------------------------------------------------------------------------------------------------------------------------------------------------------------------------------------------------------------------------------------------------------------------------------------------------------------|------------|
| 32<br>33<br>34<br>35<br>36<br>37<br>38 | <b>Integration with prior work, implications, transferability, and contribution(s) to the field</b> - Short summary of main findings; explanation of how findings and conclusions connect to, support, elaborate on, or challenge conclusions of earlier scholarship; discussion of scope of application/generalizability; identification of unique contribution(s) to scholarship in a discipline or field | Page 13-14 |
| 39<br>40                               | <b>Limitations</b> - Trustworthiness and limitations of findings                                                                                                                                                                                                                                                                                                                                            | Page 14    |

## Other

|                |                                                                                                                                               |         |
|----------------|-----------------------------------------------------------------------------------------------------------------------------------------------|---------|
| 43<br>44<br>45 | <b>Conflicts of interest</b> - Potential sources of influence or perceived influence on study conduct and conclusions; how these were managed | Page 15 |
| 46<br>47<br>48 | <b>Funding</b> - Sources of funding and other support; role of funders in data collection, interpretation, and reporting                      | Page 15 |

\*The authors created the SRQR by searching the literature to identify guidelines, reporting standards, and critical appraisal criteria for qualitative research; reviewing the reference lists of retrieved sources; and contacting experts to gain feedback. The SRQR aims to improve the transparency of all aspects of qualitative research by providing clear standards for reporting qualitative research. \*\*The rationale should briefly discuss the

1 justification for choosing that theory, approach, method, or technique rather than other  
2 options available, the assumptions and limitations implicit in those choices, and how those  
3 choices influence study conclusions and  
4 transferability. As appropriate, the rationale for several items might be discussed together.  
5

6 **Reference:**

7 O'Brien BC, Harris IB, Beckman TJ, Reed DA, Cook DA. **Standards for reporting qualitative**  
8 **research: a synthesis of recommendations.** *Academic Medicine*, Vol. 89, No. 9 / Sept 2014  
9 DOI: [10.1097/ACM.0000000000000388](https://doi.org/10.1097/ACM.0000000000000388)  
11  
12  
13  
14  
15  
16  
17  
18  
19  
20  
21  
22  
23  
24  
25  
26  
27  
28  
29  
30  
31  
32  
33  
34  
35  
36  
37  
38  
39  
40  
41  
42  
43  
44  
45  
46  
47  
48  
49  
50  
51  
52  
53  
54  
55  
56  
57  
58  
59  
60

For peer review only

# BMJ Open

## How do National Health Service (NHS) Organisations respond to patient concerns? A qualitative interview study of the Patient Advice and Liaison Service (PALS)

|                                 |                                                                                                                                                                                                                                  |
|---------------------------------|----------------------------------------------------------------------------------------------------------------------------------------------------------------------------------------------------------------------------------|
| Journal:                        | <i>BMJ Open</i>                                                                                                                                                                                                                  |
| Manuscript ID                   | bmjopen-2021-053239.R2                                                                                                                                                                                                           |
| Article Type:                   | Original research                                                                                                                                                                                                                |
| Date Submitted by the Author:   | 28-Oct-2021                                                                                                                                                                                                                      |
| Complete List of Authors:       | Shepard, Keegan; University of Oxford, Department of Experimental Psychology<br>Buivydaite, Ruta; University of Oxford, Department of Experimental Psychology<br>Vincent, Charles; University of Oxford, Experimental Psychology |
| <b>Primary Subject Heading</b>: | Health policy                                                                                                                                                                                                                    |
| Secondary Subject Heading:      | Mental health                                                                                                                                                                                                                    |
| Keywords:                       | Health & safety < HEALTH SERVICES ADMINISTRATION & MANAGEMENT, Risk management < HEALTH SERVICES ADMINISTRATION & MANAGEMENT, Health policy < HEALTH SERVICES ADMINISTRATION & MANAGEMENT                                        |
|                                 |                                                                                                                                                                                                                                  |

SCHOLARONE™  
Manuscripts



I, the Submitting Author has the right to grant and does grant on behalf of all authors of the Work (as defined in the below author licence), an exclusive licence and/or a non-exclusive licence for contributions from authors who are: i) UK Crown employees; ii) where BMJ has agreed a CC-BY licence shall apply, and/or iii) in accordance with the terms applicable for US Federal Government officers or employees acting as part of their official duties; on a worldwide, perpetual, irrevocable, royalty-free basis to BMJ Publishing Group Ltd ("BMJ") its licensees and where the relevant Journal is co-owned by BMJ to the co-owners of the Journal, to publish the Work in this journal and any other BMJ products and to exploit all rights, as set out in our [licence](#).

The Submitting Author accepts and understands that any supply made under these terms is made by BMJ to the Submitting Author unless you are acting as an employee on behalf of your employer or a postgraduate student of an affiliated institution which is paying any applicable article publishing charge ("APC") for Open Access articles. Where the Submitting Author wishes to make the Work available on an Open Access basis (and intends to pay the relevant APC), the terms of reuse of such Open Access shall be governed by a Creative Commons licence – details of these licences and which [Creative Commons](#) licence will apply to this Work are set out in our licence referred to above.

Other than as permitted in any relevant BMJ Author's Self Archiving Policies, I confirm this Work has not been accepted for publication elsewhere, is not being considered for publication elsewhere and does not duplicate material already published. I confirm all authors consent to publication of this Work and authorise the granting of this licence.

1  
2  
3 **How do National Health Service (NHS) Organisations respond to patient concerns? A**  
4 **qualitative interview study of the Patient Advice and Liaison Service (PALS)**  
5

6  
7 Dr Keegan Shepard<sup>1</sup>, Dr Ruta Buivydaite<sup>1</sup>, Prof Charles Vincent<sup>1</sup>  
8  
9

10  
11  
12  
13  
14  
15  
16  
17  
18 Correspondence:

19 Dr Ruta Buivydaite

20 Department of Experimental Psychology, University of Oxford, Radcliffe House, Radcliffe  
21 Observatory Quarter, Woodstock Road, Oxford, OX2 6GG UK

22 Email: [ruta.buivydaite@psy.ox.ac.uk](mailto:ruta.buivydaite@psy.ox.ac.uk)  
23  
24

25 <sup>1</sup> Department of Experimental Psychology, University of Oxford, Radcliffe House, Radcliffe  
26 Observatory Quarter, Woodstock Road, Oxford, OX2 6GG UK  
27

28 **Key Words:** patient concerns, complaints management, patient satisfaction, organisational  
29 learning  
30

31  
32 **Word Count:** 4661  
33  
34  
35  
36  
37  
38  
39  
40  
41  
42  
43  
44  
45  
46  
47  
48  
49  
50  
51  
52  
53  
54  
55  
56  
57  
58  
59  
60

## ABSTRACT

### Objectives

To describe the current work of the Patient Advice and Liaison Service (PALS) and assess the service's potential to resolve concerns and contribute to organisational learning.

### Design

A qualitative study using semi-structured interviews.

### Setting

Four mental health trusts and four acute trusts in the English NHS. Total of eight PALS services across different trusts.

### Participants

Twenty-four participants comprising of PALS staff and clinicians working with PALS teams.

### Methods

Semi-structured interviews were undertaken with participants using video conferencing software. The Framework Method was used for the analysis of the large qualitative dataset, which is a conventional method of analysis, similar to thematic or qualitative content analysis.

### Results

PALS teams fulfil their core responsibilities by acting as point of contact for patients, providing information and resolving a variety of recurrent problems, including PALS staff communication, staff attitudes and waiting times. The remit and responsibilities of each PALS service has often broadened over time. Barriers to resolving concerns included a lack of awareness of PALS, limited to no policies informing how staff resolve concerns, an emphasis on complaints and the attitude of clinical staff. Senior management had widely differing views on how the PALS service should operate and the management of complaints is a much higher priority. Few PALS teams carried out any analysis of the data or shared data within their organisations.

### Conclusions

PALS teams fulfil their core responsibilities by acting as point of contact for patients, providing information and resolving concerns. PALS staff also act as navigators of services, mediators between families and staff, and on occasion act as patient advocates in supporting them to raise concerns. PALS has the potential to reduce complaints, increase patient satisfaction and provide rapid organisational feedback. Achieving this potential will require more awareness and support within organisations together with update national policy guidance.

### Strengths and limitations of this study

- We were able to talk in depth both to PALS teams, to gain a rich picture of the value work of they do and the challenges they face.
- The study sites were spread widely across England and involved acute, mental health organisations.
- This study was not able to assess how frequently PALS teams succeed in resolving concerns or how their wider patient engagement and training of staff has been received.
- The clinicians interviewed were nurses, a midwife and two service managers as well as PALS team members however, no physicians were interviewed in this study.

For peer review only

## INTRODUCTION

While patients are generally very positive about the care they receive, many patients have concerns, whether or not they choose to raise these formally as complaints or claims [1-7]. Serious adverse outcomes are more likely to lead to patients using the formal pathways to raise complaints or litigation; however, many other factors, such as whether patients receive apologies and explanations, are also critically important in determining how patients and families respond [8]. Patient concerns, which go unaddressed, may lead to patients being reluctant to return to a healthcare organisation and less likely to follow the guidance of medical professionals [9, 10].

Patients, families and friends can raise concerns about their care with the Patient Advice and Liaison Service (PALS), which is provided in every National Health Service (NHS) trust in England (*Box 1*) [11]. The service was first established in 2002 with the primary aim of supporting patients and families in raising concerns, and this focus has remained unchanged at the policy level [11]. PALS maintains a presence within every NHS trust and provides services in person, by email, post and telephone. PALS teams have core duties established nationally (*Box 1*) but are free to decide how to discharge these responsibilities [11]. The approach of individual PALS teams depends on a variety of factors, including the population they serve, their level of funding and the approach taken by senior leadership in defining their local roles and responsibilities [12-14].

### *Box 1. Description of PALS and its responsibilities*

#### *Key definitions:*

- PALS - offers confidential advice, support and information on health-related matters. They provide a point of contact for patients, their families and their carers [15]
- Be noticeable and accessible within their NHS trust
- NHS trust – is an organisational unit within the National Health Service in England and Wales, generally serving either a geographical area or a specialised function. In any particular location there may be several trusts involved in the different aspects of providing healthcare to the local population [15]

#### *Key responsibilities:*

- Listen to the concerns, questions and comments raised by patients, carers, families and friends concerning their care or treatment
- Provide helpful support, as well as accurate information and advice to resolve issues and concerns as quickly as possible
- Assist NHS staff who are raising a concern on behalf of patients, which may involve liaising with other sites and healthcare organisations
- Provide information and advice to individuals wishing to raise a formal complaint

Although the service existed for almost two decades, there are very few studies of its activities or effectiveness. This is surprising given the longstanding concern with the level of complaints and litigation and the potential of PALS services to resolve concerns at an early stage. Evans, Booker



1  
2  
3 [14] found that service users reported a high level of satisfaction with PALS even when their  
4 preferred outcome was not realised. They suggested that the service had the potential to reduce  
5 complaints and was extremely cost-effective for the NHS. Since this report in 2008, the PALS  
6 service has continued to operate with almost no external review or account of how the service  
7 has evolved in the two decades since its inception [14].  
8  
9

10 This study aimed to describe the current work of PALS and to make a preliminary assessment of  
11 the potential of the service to resolve concerns and to facilitate learning from patient concerns. In  
12 particular, we aimed to explore: (1) The role of the PALS team (2) the nature and response to  
13 concerns brought to PALS; (3) barriers and facilitators of concerns resolution and (4) how PALS  
14 data is used for wider learning within the host organisation.  
15  
16  
17  
18  
19  
20  
21  
22  
23  
24  
25  
26  
27  
28  
29  
30  
31  
32  
33  
34  
35  
36  
37  
38  
39  
40  
41  
42  
43  
44  
45  
46  
47  
48  
49  
50  
51  
52  
53  
54  
55  
56  
57  
58  
59  
60

## METHODS

### Design

The interviews were analysed using a well-established approach (Framework method) described below [16]. The data collection method of semi-structured interviews was utilised with members of PALS teams and clinicians who worked with those teams.

### Participants

We purposively selected eight NHS trusts, four mental health and four acute, spread widely across England. While we did not intend to make formal comparisons between acute and mental health PALS teams, we sought to capture the range of PALS activities in a diverse group of trusts. PALS teams were initially sent a description of the study and then contacted to discuss the study and invite them to participate. We asked to interview the PALS lead or manager, and for them to nominate a PALS officer and clinician familiar with their work. Participants were informed that the purpose of the study was to explore how organisations can best respond to patient concerns. All participants approached agreed to participate and none dropped out of the study.

We interviewed three people within each NHS trust, a PALS manager, PALS officer, or their equivalents, and a clinical member of staff suggested by the PALS manager, representing a total of 24 participants. Clinical participants all had substantial experience of resolving patient concerns and experience of working with the PALS team. Five of the clinicians were nurses, one a midwife and two service managers. A sampling frame by NHS trust and role can be found in the table 1 below.

*Table 1. Sampling Frame by NHS Trust and Role*

|                                  | PALS Managers<br>(N = 8) | PALS Officers<br>(N = 8) | Clinicians<br>(N = 8) |
|----------------------------------|--------------------------|--------------------------|-----------------------|
| Acute NHS Trusts (N = 4)         | 4                        | 4                        | 4                     |
| Mental Health NHS Trusts (N = 4) | 4                        | 4                        | 4                     |

### Development of semi-structured interview

The interview schedule development was informed by a literature review, three pilot interviews, and discussion with Patient Advisors (Appendix I). The interview addressed a range of different topics, including the role of PALS teams, policies and guidance outlining their responsibilities, relationship between PALS and clinical staff, patient and staff awareness, barriers to resolving concerns, data collection and analysis, as well as recommendations to improve going forward. Phrasing of specific questions varied slightly across the three types of participants but covered the same core content.

Participants were offered their preference of video conferencing software, including Microsoft Teams, Zoom and Skype, as well as an option to conduct the interview over the phone. In total, 24 semi-structured interviews were conducted between July and October 2020, lasting an average of 41 minutes each. Data saturation was reached after interviewing the participants from the 7<sup>th</sup> trust, however we continued interviewing as we aimed to have 8 trusts in total (4 mental health and 4 acute).

## Data analysis

Interviews were audio-recorded, transcribed verbatim and anonymised, before being uploaded onto © 2018 QSR International's NVivo 12 Software. The interviews were stored on password protected university computers. The seven stages of the Framework Method of data analysis were adhered to throughout the processes of analysis [17]. Following familiarisation with the interviews, the process of coding was carried out with the first four transcripts to develop an initial analytical framework. Notes taken during and after interviews assisted in the identification of core themes. Any salient emergent categories were grouped into subdominant themes, which were subsequently grouped into broader dominant themes. The coding framework was reviewed and refined by the authors in successive iterations, before being reapplied to new transcripts, and further refined to produce the final coding framework (table 2).

*Table 2: Stages in the Framework Method of Data Analysis*

| Stage | Procedure                        |
|-------|----------------------------------|
| 1     | Transcribing interviews          |
| 2     | Familiarisation with transcripts |
| 3     | Coding transcripts               |
| 4     | Developing analytical framework  |
| 5     | Applying analytical framework    |
| 6     | Tabulating data in matrix        |
| 7     | Interpreting data                |

[17]

The full data set was then tabulated in a matrix, which presented the data in a visually accessible and navigable format. A key feature of the Framework Method is the matrix output, which was pivotal in the identification of subdominant and dominant themes. Data analysis was carried out by one author (KCS), with additional double coding of a sample of interviews (RB) to ensure consistency of coding and interpretation. The two analysts had no prior connection with PALS, had never used the PALS service and this was their first encounter with the service.

The initial results were shared with the participants, they provided the feedback, but the original themes remain. No major changes were made to the findings or further interviews undertaken.

## Participant anonymization

1  
2  
3 The participant's quotes were anonymised using the agreed coding method. Alphabetical letters  
4 were given to each participant and the number for their level of seniority: 1 is PALS Manager, 2  
5 is PALS Officer and 3 is the Clinician. Each trust was given letter T and a number. Thus, [D1, T3]  
6 represents a PALS Manager from trust 3.  
7

## 8 9 **Patient and public involvement**

10  
11 Two Patient and Public Involvement (PPI) Lay Research Advisors from the Quality, Safety and  
12 Outcomes Policy Research Unit ([www.qso.ac.uk](http://www.qso.ac.uk)) reviewed the design of study, the materials  
13 used, including the interview schedules, and provided comments on the findings.  
14  
15

## 16 **Ethics**

17  
18  
19 The study was assessed and categorised as a service evaluation by the local ethics committee.  
20 All participants provided written informed consent to take part in the interviews.  
21

## 22 **RESULTS**

23  
24  
25 A total of 24 participants, including eight PALS managers, eight PALS officers, or their  
26 equivalents, as well as eight healthcare staff working with PALS teams, were interviewed. Four  
27 dominant themes emerged from the analysis: the Role of PALS, Concerns and their Resolution,  
28 Barriers to Resolution, and Learning from Concerns. Common themes were found across mental  
29 health and acute trusts, although the nature of concerns raised naturally varied in different  
30 contexts. For simplicity, we use the word 'patient' to broadly indicate the person raising the  
31 concern, while being aware that this may be a friend or family member, as well as that the term  
32 'service-user' is more commonly used in mental health organisations.  
33  
34  
35

### 36 **The role of PALS**

37  
38 PALS acts as a point of contact for patients and service-users, to answer questions and respond  
39 to whatever concerns they have. PALS staff frequently contact clinicians to seek information and,  
40 where necessary, look for help in resolving conflicts or misunderstandings that have arisen.  
41 Additionally, PALS teams may be asked to provide information to those wishing to submit a formal  
42 complaint. Patients have the option to '*see them in person, on the telephone, email*' [D1-T4], as  
43 well as through post and social media in most NHS trusts. There was no consensus from  
44 participants on which group, clinicians or PALS, was better suited for resolving concerns, as '*it*  
45 *depends on the concern*' [E2-T5] and '*there are pros to both*' [H3-T8].  
46  
47  
48

49 PALS clearly continues to provide the services set out in the original policies and guidance.  
50 However, the PALS service has evolved in different ways in each trust and their remit and  
51 responsibilities have often broadened considerably beyond their core duties. Almost all PALS  
52 managers and officers described the role of PALS as being a '*catch-all service*' [E1-T5], where  
53 due to the operational pressures facing NHS trusts, they are used more as a switchboard to pick  
54  
55  
56  
57  
58  
59  
60

up calls and duties that no one else in their trust will do, as well as *'handle loads more than just patient concerns'*, as a result [E2-T5].

*'Their remit is to be that jam in the sandwich, if you like. So they are the portal. So when families or anybody make contact with a trust, that they are a way in, a route in, a funnel, if you like, for any concerns or questions or requests in any form.'* [B1-T2]

*'It's probably the case for most PALS teams. But we're...I think the easiest kind of metaphor is that we're kind of a sweeper in soccer terms with a sweeper, anything that no one else can deal with, people sort of direct it to us.'* [E1-T5]

Participants who described this catch-all service role said it resulted from a combination of the pressures on clinical staff, a lack of clear guidance and definition of their role within each trust, as well as a lack of awareness of national policy on the part of senior staff in their respective trusts. However, despite the feeling that they fulfil duties and responsibilities beyond the scope of their role, they all emphasised that their central role is to be there for patients to provide help wherever and whenever they can.

*'I'm here for the patients, I'm happy to help anybody as much as I can. And, you know, and I hope I do a good job at the same time'* [B2 - T3].

## Resolution of concerns

*What concerns do patients have?*

PALS staff reported that most patient concerns related to communication, staff attitudes and waiting times. Clinicians saw these same concerns frequently but emphasised that communication and clarity about discharge plans were the most frequent concerns.

*'A lot of them are about how long people have had to wait for appointments, that's one of the big concerns that comes through all the time. Another one is communication, actually, and how people hear things that doctors have said, or not hear them, that doctors have said to them or the way they've spoken to them, or you're not getting answers that they wanted to hear.'* [D1-T4]

*'Nine times out of ten, it's regarding discharge. It could be anything from discharges, having to wait for such a long time for their letters or their tablets to go home.'* [B3-T2]

*'A lot of it is just about communication and attitude and not getting answers when they want answers.'* [C3-T3]

Clinical staff and managers were clear that they saw resolving concerns as a legitimate part of their role, but that it required skills that not everyone has necessarily developed.

*'I think it's about using your skills that you might have developed as a clinician in terms of engagement, listening and so on and so forth. And just recognising that you've got that skill set, it's just turning it into a different function, you know, for a different outcome.'* [I3-T9]

#### When does PALS become involved?

Patients may come to PALS because they have not been able, for whatever reason, to resolve their concern or problem with clinical staff. However, patients may sometimes approach PALS directly, without first discussing their concern with clinical staff or managers as they may believe that raising their concern will have a negative impact on relationships with people caring for them or on their treatment. Clinicians who are aware of PALS may also contact the service directly or signpost the patient to PALS, if concerns cannot be resolved locally.

Once contacted, PALS teams all appeared to follow a structured process, where they liaise with the patient and clinician to find a solution to the problem presented.

*'A concern is received via email or by phone, and the PALS Officer will establish what the concern is. If it's very straightforward, they'll act upon it straightaway. If it's not straightforward, they'll need to contact the patient and then discuss what outcomes they're seeking. Once they understand, or believe that they understand, fully well what the outcome is that they're asking for, they'll take action.'* [C1-T3]

PALS staff are often able to find information for a patient simply because they know who to contact within their trust and how to contact them as a result of previously built relationships and experience. In this sense, they act as 'navigators' of the healthcare system and sometimes, more forcefully, as advocates for patients where a firmer approach is required.

The principal strengths of PALS were that they had more experience and 'a particular skill set' [F1-T6] for resolving concerns, as well as that they represent an impartial third party, acting as a mediator between clinicians and service-users.

*'We're slightly removed, separate from that department. We are employed by the trust. But we're more like a third party that patients like so they don't feel like it's them versus the clinicians and NHS, you know, we're their back-up and mouthpiece.'* [A2-T1]

To do their job effectively, PALS staff do need time to build these relationships within the trust and to familiarise themselves with a particular ward, for instance, to better understand what happened and who was involved.

*'I think what becomes very tricky is if somebody external is investigating a complaint about the complex needs service and don't know how the service works.'* [F3-T6]

Despite their different roles, all participants agreed that resolving concerns informally was preferable to resolving formal complaints, as the former requires fewer resources from the NHS trust and provides the service-user with a much faster resolution.

*'The idea of PALS is that hopefully we can resolve things quicker so we can just walk up to a ward and see someone or we can go and chat to the ward sister or send a quick email or do a quick phone call. Whereas the complaints process is, you know, three days to acknowledge, 25 working days to respond.'* [A2-T1]

#### Barriers to resolution of concerns

1  
2  
3 Participants described several barriers that restrict the ability of both PALS and clinicians to  
4 resolve informal concerns within their trusts, including a lack of awareness of PALS, an absence  
5 of policies outlining the scope of their role, an emphasis on complaints instead of concerns by  
6 their organisations, as well as an unavailability and attitude of clinical staff.  
7

### 8 *Lack of Awareness*

9

10 The most significant barrier was the perception in all eight trusts of a widespread lack of  
11 awareness of PALS and the services that they provide.  
12

13  
14 *'In my experience, clinical teams have a really bad understanding of what PALS is and*  
15 *what PALS does.'* [E2-T5]  
16

17 *'They're only aware of them, really, if they've used them before or we inform them.*  
18 *There are posters up, you know, if you go to any ward at the moment, there's posters*  
19 *up about everything. And if you're sick in bed, you're not going to be reading those*  
20 *posters in reality. So, yes, it's up to us to inform them.'* [A3-T1]  
21

22 In some cases, the location of PALS teams within NHS trusts contributed to lack of patient  
23 awareness. While the majority of PALS teams within acute NHS trusts had offices that were  
24 accessible to patients and located near a waiting area, while PALS teams in mental health NHS  
25 trusts were largely inaccessible and hidden so that patients could only reach them by phone, letter  
26 or email, thereby reducing awareness.  
27

28  
29 *'I think from a patient or person coming to PALS, I don't think people are clear on what*  
30 *actually we do. So I think if you go into an acute service hospital, you're going to usually*  
31 *an office where it says PALS.'* [I1-T9]  
32

### 33 *Lack of Policies and Guidance Informing their Application*

34

35 Almost all PALS services who participated in the study did not have clear policies or guidance  
36 within their trusts defining the scope of their role and responsibilities of the team. As a result, a  
37 majority of PALS staff questioned their individual role and wished for some written guidelines.  
38

39 *'I'm not really sure what my role is properly at the moment.'* [I1-T9]  
40

41 *'There needs to be some guidance for trusts to actually deliver what PALS really should*  
42 *be about.'* [A1-T1]  
43

44 PALS managers noted that the lack of policies and guidance increased the variability of PALS  
45 teams across England and led to the misuse of PALS within some trusts.  
46

47 *'It makes me quite sad when I hear about other trusts, when they are using PALS in a way*  
48 *that I just don't feel is appropriate. I don't feel it's the right way...and I'm certainly not saying*  
49 *we're perfect. Far from it.'* [A1-T1]  
50

### 51 *Emphasis on complaints*

52

53  
54 All participants reported that senior staff in every organisation paid much more attention to  
55 complaints than concerns, because complaints handling is a *'regulated service'* [A1-T1] that is  
56  
57

1  
2  
3 monitored by regulators. This led to a lack of understanding and appreciation of the role and value  
4 of PALS.  
5

6 *'PALS does get overlooked and that happens within our trust.'* [E2-T5]  
7

8 *'It felt very much like that PALS was a lower step down from complaints.'* [D2-T4]  
9

10 Participants believed that this emphasis on complaints sometimes led to clinicians directing  
11 patients to submit a formal complaint, when PALS could have resolved the concern instead  
12 informally.  
13

14 *'We have some consultants who feel that PALS is an unnecessary link in the chain  
15 and think "I'll address it and if I can't address it, then complaints will address it.'* [D2-T4]  
16  
17

### 18 *Attitude and unavailability of Clinical Staff*

19  
20

21 Clinicians interviewed also reported that a majority of their clinical colleagues view PALS in a  
22 positive light but simply do not have time to liaise effectively. Additionally, PALS staff reported  
23 that they often cannot find specific clinicians due to a lack of updated contact details.  
24

25 *'It's getting hold of the person who can solve the problem for us. You know, we can email  
26 a consultant, but he may not be able to get to his emails for a little while.'* [D1-T4]  
27

28 *'Our services change every day, you know, people are moving in posts, you know,  
29 different managers, different services. Managers will move between services. Services  
30 will open and close. And no one will tell us. We have no way of knowing at all what  
31 services are open, what services are not, who's managing which service.'* [E2-T5]  
32  
33

### 34 **Learning from concerns**

35

36 While the principal remit of PALS is the resolution of individual concerns, there is clearly potential  
37 for reflecting on those concerns to inform wider learning and improvement. Incident reports and  
38 complaints are routinely reviewed to provide feedback and stimulate learning and improvement,  
39 and participants argued that the same could be done for PALS data.  
40

#### 41 *What data is collected?*

42

43 In the collection of concerns data, it was clear that only a minority of PALS teams involved in the  
44 study had established a robust approach, which involved assigning specific categories to informal  
45 concerns, recording who was involved, relevant dates and the outcome; however, a large majority  
46 of PALS teams simply record a general description of the concern.  
47

48 *'We have a whole host of codes that we use, including, for example, communication,  
49 lost property. So it's not what we think. So we don't think, 'well I don't think it was a staff  
50 member was rude', it is what the patient thinks.'* [C2-T3]  
51

52 *'There aren't really any categories, so it's a complaint or a PALS inquiry or it's a local  
53 resolution. And then the detail of that complaint is just our account of it. So there's not a  
54 pull-down bar that says "it's this category, or that category, whatever.'* [I1-T9]  
55  
56  
57  
58  
59  
60



1  
2  
3 *What is done with the data?*  
4

5 Few PALS teams or their organisations across England carried out no analysis of the data or  
6 reflected on the many patient concerns collected.  
7

8 *'We're not analysing...all we're doing at the moment is counting the numbers. And the*  
9 *most detailed analysis that we do, which is all off of an Excel spreadsheet, is the number*  
10 *of days to completion.'* [I1-T9]  
11

12 A recurring theme from the interviews was that there was no interest from senior trust staff in the  
13 patient concerns data and that all the emphasis is on formal complaints data.  
14

15 *'The data that we produce has always been an addendum, really an appendix to the*  
16 *complaints material.'* [E1-T5]  
17

18 *'At those meetings they talk about complaints, but they don't really ask what's going on,*  
19 *what the trends are.'* [I1-T9]  
20  
21

22 Participants acknowledged that there was no learning from informal concerns within their NHS  
23 trust, and that the data was not shared beyond their organisation.  
24

25 *'This may be shocking to you, as I wish I could say "Oh, yeah, PALS has done this and*  
26 *PALS has done that and we've affected loads of changes". As far as I'm concerned. No,*  
27 *we haven't.'* [E1-T5]  
28

29 *'PALS data doesn't really get shared beyond the organisation, because there isn't that*  
30 *requirement.'* [C1-T3]  
31

32 Despite not using concerns data to inform organisational learning, all participants understood the  
33 potential for PALS data to be used as an *'early warning system'* [E1-T5]. For instance, participants  
34 described how patients tend to raise informal concerns immediately, whereas complaints may be  
35 raised months after an incident.  
36

37 *'One of the things about PALS is that obviously it's pretty much real time feedback,*  
38 *whereas complaints is often delayed. People sometimes don't raise the complaint until*  
39 *a year after it's happened or six months or three months or whatever.'* [C1-T3]  
40  
41  
42  
43  
44  
45  
46  
47  
48  
49  
50  
51  
52  
53  
54  
55  
56  
57  
58  
59  
60

## DISCUSSION

PALS was established to provide support, information and advice to patients and families, as well as to resolve their concerns in a timely manner. PALS teams interviewed in this study are certainly fulfilling these core responsibilities. The PALS service has however evolved in different ways in each trust and their remit and responsibilities have often broadened considerably beyond their core duties. Many of the teams have become a kind of 'catch all' service taking on any patient liaison work not allocated elsewhere. Most participants reported that senior managers within their trusts seemed largely unaware of the core national responsibilities of PALS and, even within trusts, had widely differing views on how the PALS service should operate. A recurring theme was that complaints were given much higher priority and that little interest was shown in the work of PALS. All staff agreed that interventions by PALS had the advantage of being much quicker, less burdensome to both patients and staff and more personal in nature than the formal complaints process.

PALS staff appear to adopt multiple different roles according to the needs of patients and families. They certainly fulfil their core role of providing support, advice and information to patients. At times, however, PALS staff also appear to act as navigators of services, mediators between families and staff and occasionally also to act as patient advocates in supporting them to raise concerns [18-21]. The role of navigator is particularly critical as patients often experience services as complex and not well integrated [22-24]. We cannot of course, from this study, assess how often PALS staff adopt each of these roles or how often their intervention produces a successful outcome. However, they clearly do provide support to patients and families in a variety of ways, which appear not fully appreciated by their host organisations.

Most participants believed that PALS could achieve much more if the services were given more support and resources by senior management. Even within existing resources however, there is scope to develop the PALS service by sharing examples of innovation across PALS teams. PALS services could, for instance, be advertised much more widely in NHS organisations; in particular, by informing clinicians that PALS can support them as well as their patients [25]. Some PALS staff are much more active than others and regularly visit wards to talk to patients, engage with staff and pre-empt potential problems. Some PALS teams were more proactive still in providing training to clinical staff on how to communicate effectively and resolve patient concerns at source.

There is currently no requirement for PALS teams to collect data or any guidance for them on how this might be done. Yet, concerns data represent a rich source of information, potentially timelier and more sensitive to patient experience than data from complaints [1]. It would be relatively straightforward to produce a national framework for the recording and classification of patient concerns, which should have a strong emphasis on recording actions taken and outcomes [26, 27]. The existing framework for complaints could also be modified for less serious problems [28]. This would allow organisations to learn from concerns and, equally important, allow wards and hospital services to monitor patient concerns near real time [1, 14]. This is particularly useful for detecting clusters of problems or a sudden escalation of problems in a particular area, which would be revealed much more quickly in PALS data than in complaints systems.

## Strengths and limitations

This study is one of the very few to examine the role of PALS and the potential of services of this kind to resolve patient concerns and contribute to learning. To our knowledge, this is the only study of PALS in the last decade. We were able to talk in depth both to PALS teams and to clinicians and managers who worked with those teams to gain a rich picture of the work of PALS and the challenges they face. The study sites were spread widely across England and involved acute, mental health organisations. This qualitative study should however be considered only as an initial exploration of the work of PALS. In particular we cannot be sure how frequently PALS teams succeed in resolving concerns or how their wider patient engagement and training of staff has been received.

## CONCLUSIONS

PALS teams fulfil their core responsibilities by acting as a point of contact for patients, providing information and resolving a variety of recurrent problems. The remit and responsibilities of each PALS service has often broadened considerably over time. Senior healthcare management had widely differing views on how the PALS service should operate and viewed complaints as having a much higher priority. Few PALS teams carried out any analysis of collected data or shared data within their organisations. The role of PALS teams, with their focus on early resolution of concerns and potential problems, could be enhanced to potentially increase patient satisfaction and reduce the need for patients to make formal complaints.

## Acknowledgements

The authors would like to thank the eight participating NHS trusts in England, as well as the kind PALS staff and clinicians who all gave their time during a pandemic to contribute to this service evaluation. In addition, the authors would like to thank the two Patient and Public Involvement (PPI) Lay Research Advisors, provided by the Quality, Safety and Outcomes Policy Research Unit (QSO-PRU), who all enriched the quality of the service evaluation by contribution their unique and important perspectives. We thank Jules Forder, Ray Fitzpatrick and Helen Hogan for comments on an earlier draft of this manuscript.

## Author Affiliations

KCS, CV and RB are affiliated with the University of Oxford.

## Contributors

KCS and CV conceived the service evaluation and all authors contributed to its design. KCS carried out all of the data collection. RB and KCS carried analysis, while CV extensively supervised and provided support during the process. KCS and RB drafted the manuscript, and all of the authors reviewed and agreed on the current version.

## The research team

RS and KCS have used the qualitative methodology throughout their careers as researchers. They both had extensive qualitative methods training during their studies in their respective Universities. CV has supervised many qualitative studies but received no formal training in qualitative methods.

## Funding

This study was funded by the National Institute for Health Research (NIHR) Policy Research Programme, conducted through the Quality, Safety and Outcomes Policy Research Unit, PR-PRU-1217-20702. The views expressed are those of the author(s) and not necessarily those of the NIHR or the Department of Health and Social Care.

## Competing Interests

None declared.

## Patient Consent

This research was classified as service evaluation therefore we followed the typical protocols of such research and patient consent was not required.

## Data sharing statement

The transcripts and original interviews will not be shared as permission from participants was not granted.

**Ethics Statement**

This project has been reviewed by the Joint Research Office study classification group. It was determined that the activity described is best understood as a service evaluation. As such, it is not subject to the Department of Health's UK Policy Framework for Health and Social Care Research (2017). It requires neither sponsorship nor research ethics review.

For peer review only

## References

1. Anderson, W.G., K. Winters, and A.D. Auerbach, *Patient concerns at hospital admission*. Arch Intern Med, 2011. **171**(15): p. 1399-400.
2. Commission, C.Q., *Survey Finds Most Patients Are Positive About Their Hospital Care, But Many Still Experience Delays When They Leave*, C.Q. Commission, Editor. 2017: Online.
3. Heyn, L., C.M. Ruland, and A. Finset, *Effects of an interactive tailored patient assessment tool on eliciting and responding to cancer patients' cues and concerns in clinical consultations with physicians and nurses*. Patient Educ Couns, 2012. **86**(2): p. 158-65.
4. Mjaaland, T.A., et al., *Patients' negative emotional cues and concerns in hospital consultations: a video-based observational study*. Patient Educ Couns, 2011. **85**(3): p. 356-62.
5. Mulcahy, L. and J.Q. Tritter, *Pathways, Pyramids and Icebergs? Mapping the Links Between Dissatisfaction and Complaints*. Sociology of Health & Illness, 1998. **20**(6): p. 825-847.
6. O'Hara, J.K., et al., *What can patients tell us about the quality and safety of hospital care? Findings from a UK multicentre survey study*. BMJ Quality & Safety, 2018. **27**(9): p. 673-682.
7. Williams, B., *Patient satisfaction: A valid concept?* Social Science & Medicine, 1994. **38**(4): p. 509-516.
8. Vincent, C., M. Young, and A. Phillips, *Why do people sue doctors? A study of patients and relatives taking legal action*. Lancet, 1994. **343**(8913): p. 1609-13.
9. Burroughs, T.E., et al., *Patients' concerns about medical errors during hospitalization*. Jt Comm J Qual Patient Saf, 2007. **33**(1): p. 5-14.
10. Burroughs, T.E., et al., *Patient concerns about medical errors in emergency departments*. Acad Emerg Med, 2005. **12**(1): p. 57-64.
11. Heaton, J., P. Sloper, and S. Clarke, *Access to and use of NHS Patient Advice and Liaison Service (PALS): the views of children, young people, parents and PALS staff*. Child: Care, Health and Development, 2008. **34**(2): p. 145-151.
12. Abbott, S., et al., *Patient Advice and Liaison Services: strengthening the voices of individual service users in health-care organizations*. Health Expectations, 2006. **9**: p. 138-147.
13. Heaton, J. and P. Sloper, *National survey of Patient Advice and Liaison Services (PALS) in England: children, young people and parents' access to and use of PALS*. Child: Care, Health and Development, 2004. **30**(5): p. 495-501.
14. Evans, D., et al., *National Evaluation of Patient Advice and Liaison Services (PALS), in Final Report*. 2008, University of the West of England: online. p. 1-324.
15. Services, N.H. *What is PALS (Patient Advice and Liaison Service)?* 2021 [cited 2021 28-08-2021]; Available from: <https://www.nhs.uk/nhs-services/hospitals/what-is-pals-patient-advice-and-liaison-service/>.
16. Merriam, S.B. and S.B. Merriam, *Qualitative research : a guide to design and implementation*. 2009, San Francisco: Jossey-Bass.
17. Gale, N.K., et al., *Using the framework method for the analysis of qualitative data in multi-disciplinary health research*. BMC Medical Research Methodology, 2013. **13**(1): p. 117.
18. Tho, P.C. and E. Ang, *The effectiveness of patient navigation programs for adult cancer patients undergoing treatment: a systematic review*. JBI Database System Rev Implement Rep, 2016. **14**(2): p. 295-321.

19. Ellen, M.E., R. Shach, and R.D. Balicer, *Helping patients help themselves: Supporting the healthcare journey*. Patient Education and Counseling, 2018. **101**(9): p. 1708-1711.
20. Kelly, K.J., S. Doucet, and A. Luke, *Exploring the roles, functions, and background of patient navigators and case managers: A scoping review*. Int J Nurs Stud, 2019. **98**: p. 27-47.
21. Gilbert, J.E., et al., *Nurses as patient navigators in cancer diagnosis: review, consultation and model design*. Eur J Cancer Care (Engl), 2011. **20**(2): p. 228-36.
22. Wennberg, J.E., *Time to tackle unwarranted variations in practice*. BMJ, 2011. **342**: p. d1513.
23. Neuhauser, D., L. Provost, and B. Bergman, *The meaning of variation to healthcare managers, clinical and health-services researchers, and individual patients*. BMJ Qual Saf, 2011. **20 Suppl 1**(Suppl\_1): p. i36-40.
24. Mailloux, C. and E. Halsey. *Patient Navigators as Essential Members of the Healthcare Team: A Review of the Literature*. 2018.
25. Montgomery, C.M., et al., *Wild data: how front-line hospital staff make sense of patients' experiences*. Sociology of Health & Illness, 2020. **42**(6): p. 1424-1440.
26. Coulter, A., et al., *Collecting data on patient experience is not enough: they must be used to improve care*. Bmj, 2014. **348**: p. g2225.
27. Martin, G.P., L. McKee, and M. Dixon-Woods, *Beyond metrics? Utilizing 'soft intelligence' for healthcare quality and safety*. Soc Sci Med, 2015. **142**: p. 19-26.
28. Reader, T.W., A. Gillespie, and J. Roberts, *Patient complaints in healthcare systems: a systematic review and coding taxonomy*. BMJ Quality & Safety, 2014. **23**(8): p. 678-689.

## Appendix I



*An exploration of how organisations best respond to patient concerns.*

## Interview Schedule - PALS Officer

### Introduction

*Introduction of self and study (including differentiation between complaints and concerns), and reassurance of measures taken to protect anonymity. Thank them for taking the time to talk about their perceptions of how organisations best respond to patient concerns.*

### Breakdown of Role and PALS

*Immediate or core functions, duties and responsibilities of role and PALS team more generally*

*Perceptions of unique and extra duties and responsibilities of PALS team (surgeries, for example)*

- *Who instigated these changes?*

*Take me through the journey of a patient concern coming in from start to finish*

*How do you think PALS contributes to improving the service more generally?*

- *How could it be changed to help improve the service even more?*

### Policies and Guidance

*Do you have policy documents informing what you do?*

- *Was the development of these informed by other PALS teams or national guidelines?*
- *What is the timeframe to respond to concerns?*

### Relationship with Complaints Team

*What is the relationship between PALS and Complaints within your NHS Trust?*

*What are the strengths and limitations of this dynamic?*

### Patient Awareness

*How do PALS make patients aware of their presence and role?*

### Pathways Available to Patients

*What pathways do patients use to report their concerns?*

- *How does PALS monitor each?*

*How does the pathway used by patients impact the resolution of their concern?*

### Data

Dated: 21/1/2020 – Version 1



1  
2  
3 *What system do you use?*

- 4 - *i.e. Ulysses, Datix, etc.*

5  
6 *Do you do anything with the data?*

- 7 - *If not, how could you implement the learning from concerns?*

### 8 9 **Training**

10 *Do you train or work with staff to help them respond to concerns on the ground?*

- 11 - *If so, could you tell me a bit about your approach?*

### 12 13 **Issues**

14 *What issues, or barriers, are present that you think are restricting your ability to respond to patient*  
15 *concerns?*

### 16 17 **Recommendations**

18 *What recommendations could be made to improve how PALS, or the overall organisation, respond*  
19 *successfully to patient concerns?*

20 *Do you have any suggestions about other ways PALS data and patient experiences and concerns*  
21 *could be used to improve services?*

22  
23 *What would you suggest that researchers focus on to better understand how organisations could*  
24 *become better at responding to patient concerns?*

---

25  
26  
27  
28 ***These topics are a guide to stimulate naturalistic conversation that will be probed further depending on the***  
29 ***responses of each individual participant.***

### 30 31 **Some examples of prompt questions:**

32  
33 Can you tell me a little more about that?

34  
35 How do you explain that?

36  
37 In what way?

38  
39 Can you explain that?

40  
41 How is that?

42  
43  
44  
45  
46  
47  
48  
49  
50  
51  
52  
53  
54  
55  
56  
57  
58 **Dated: 21/1/2020 – Version 1**

## Standards for Reporting Qualitative Research (SRQR)\*

<http://www.equator-network.org/reporting-guidelines/srqr/>

Page/line no(s).

### Title and abstract

|                                                                                                                                                                                                                                                              |        |
|--------------------------------------------------------------------------------------------------------------------------------------------------------------------------------------------------------------------------------------------------------------|--------|
| <p><b>Title</b> - Concise description of the nature and topic of the study Identifying the study as qualitative or indicating the approach (e.g., ethnography, grounded theory) or data collection methods (e.g., interview, focus group) is recommended</p> | Page 1 |
| <p><b>Abstract</b> - Summary of key elements of the study using the abstract format of the intended publication; typically includes background, purpose, methods, results, and conclusions</p>                                                               | Page 2 |

### Introduction

|                                                                                                                                                                     |        |
|---------------------------------------------------------------------------------------------------------------------------------------------------------------------|--------|
| <p><b>Problem formulation</b> - Description and significance of the problem/phenomenon studied; review of relevant theory and empirical work; problem statement</p> | Page 3 |
| <p><b>Purpose or research question</b> - Purpose of the study and specific objectives or questions</p>                                                              | Page 4 |

### Methods

|                                                                                                                                                                                                                                                                                                                                                                                                             |          |
|-------------------------------------------------------------------------------------------------------------------------------------------------------------------------------------------------------------------------------------------------------------------------------------------------------------------------------------------------------------------------------------------------------------|----------|
| <p><b>Qualitative approach and research paradigm</b> - Qualitative approach (e.g., ethnography, grounded theory, case study, phenomenology, narrative research) and guiding theory if appropriate; identifying the research paradigm (e.g., postpositivist, constructivist/ interpretivist) is also recommended; rationale**</p>                                                                            | Page 5   |
| <p><b>Researcher characteristics and reflexivity</b> - Researchers' characteristics that may influence the research, including personal attributes, qualifications/experience, relationship with participants, assumptions, and/or presuppositions; potential or actual interaction between researchers' characteristics and the research questions, approach, methods, results, and/or transferability</p> | Page 15  |
| <p><b>Context</b> - Setting/site and salient contextual factors; rationale**</p>                                                                                                                                                                                                                                                                                                                            | Page 3-4 |
| <p><b>Sampling strategy</b> - How and why research participants, documents, or events were selected; criteria for deciding when no further sampling was necessary (e.g., sampling saturation); rationale**</p>                                                                                                                                                                                              | Page 5-6 |
| <p><b>Ethical issues pertaining to human subjects</b> - Documentation of approval by an appropriate ethics review board and participant consent, or explanation for lack thereof; other confidentiality and data security issues</p>                                                                                                                                                                        | Page 7   |
| <p><b>Data collection methods</b> - Types of data collected; details of data collection procedures including (as appropriate) start and stop dates of data collection and analysis, iterative process, triangulation of sources/methods, and modification of procedures in response to evolving study findings; rationale**</p>                                                                             | Page 6-7 |

|                       |                                                                                                                                                                                                                                                       |        |
|-----------------------|-------------------------------------------------------------------------------------------------------------------------------------------------------------------------------------------------------------------------------------------------------|--------|
| 1<br>2<br>3<br>4<br>5 | <b>Data collection instruments and technologies</b> - Description of instruments (e.g., interview guides, questionnaires) and devices (e.g., audio recorders) used for data collection; if/how the instrument(s) changed over the course of the study | Page 6 |
| 6<br>7<br>8           | <b>Units of study</b> - Number and relevant characteristics of participants, documents, or events included in the study; level of participation (could be reported in results)                                                                        | Page 5 |
| 9<br>10<br>11<br>12   | <b>Data processing</b> - Methods for processing data prior to and during analysis, including transcription, data entry, data management and security, verification of data integrity, data coding, and anonymization/de-identification of excerpts    | Page 6 |
| 13<br>14<br>15<br>16  | <b>Data analysis</b> - Process by which inferences, themes, etc., were identified and developed, including the researchers involved in data analysis; usually references a specific paradigm or approach; rationale**                                 | Page 6 |
| 17<br>18<br>19<br>20  | <b>Techniques to enhance trustworthiness</b> - Techniques to enhance trustworthiness and credibility of data analysis (e.g., member checking, audit trail, triangulation); rationale**                                                                | Page 6 |

## Results/findings

|                      |                                                                                                                                                                                                   |           |
|----------------------|---------------------------------------------------------------------------------------------------------------------------------------------------------------------------------------------------|-----------|
| 23<br>24<br>25<br>26 | <b>Synthesis and interpretation</b> - Main findings (e.g., interpretations, inferences, and themes); might include development of a theory or model, or integration with prior research or theory | Page 7-12 |
| 27<br>28<br>29       | <b>Links to empirical data</b> - Evidence (e.g., quotes, field notes, text excerpts, photographs) to substantiate analytic findings                                                               | Page 7-12 |

## Discussion

|                                        |                                                                                                                                                                                                                                                                                                                                                                                                             |            |
|----------------------------------------|-------------------------------------------------------------------------------------------------------------------------------------------------------------------------------------------------------------------------------------------------------------------------------------------------------------------------------------------------------------------------------------------------------------|------------|
| 32<br>33<br>34<br>35<br>36<br>37<br>38 | <b>Integration with prior work, implications, transferability, and contribution(s) to the field</b> - Short summary of main findings; explanation of how findings and conclusions connect to, support, elaborate on, or challenge conclusions of earlier scholarship; discussion of scope of application/generalizability; identification of unique contribution(s) to scholarship in a discipline or field | Page 13-14 |
| 39<br>40                               | <b>Limitations</b> - Trustworthiness and limitations of findings                                                                                                                                                                                                                                                                                                                                            | Page 14    |

## Other

|                |                                                                                                                                               |         |
|----------------|-----------------------------------------------------------------------------------------------------------------------------------------------|---------|
| 43<br>44<br>45 | <b>Conflicts of interest</b> - Potential sources of influence or perceived influence on study conduct and conclusions; how these were managed | Page 15 |
| 46<br>47<br>48 | <b>Funding</b> - Sources of funding and other support; role of funders in data collection, interpretation, and reporting                      | Page 15 |

\*The authors created the SRQR by searching the literature to identify guidelines, reporting standards, and critical appraisal criteria for qualitative research; reviewing the reference lists of retrieved sources; and contacting experts to gain feedback. The SRQR aims to improve the transparency of all aspects of qualitative research by providing clear standards for reporting qualitative research. \*\*The rationale should briefly discuss the

1 justification for choosing that theory, approach, method, or technique rather than other  
2 options available, the assumptions and limitations implicit in those choices, and how those  
3 choices influence study conclusions and  
4 transferability. As appropriate, the rationale for several items might be discussed together.  
5

6 **Reference:**

7 O'Brien BC, Harris IB, Beckman TJ, Reed DA, Cook DA. **Standards for reporting qualitative**  
8 **research: a synthesis of recommendations.** *Academic Medicine*, Vol. 89, No. 9 / Sept 2014  
9 DOI: [10.1097/ACM.0000000000000388](https://doi.org/10.1097/ACM.0000000000000388)  
11  
12  
13  
14  
15  
16  
17  
18  
19  
20  
21  
22  
23  
24  
25  
26  
27  
28  
29  
30  
31  
32  
33  
34  
35  
36  
37  
38  
39  
40  
41  
42  
43  
44  
45  
46  
47  
48  
49  
50  
51  
52  
53  
54  
55  
56  
57  
58  
59  
60

For peer review only
